# Supplementary material for: Predicting biomolecule adsorption on nanomaterials: a hybrid framework of molecular simulations and machine learning
Source: Royal Society of Chemistry journal article supplement (doi:10.1039/d4nr05366d), 2025-01-01
Supplement: d4nr05366d2.xlsx [file d4nr05366d2.xlsx]

## Sheet: NanoDescriptors
ID	Nanomaterials	Number of rotable bonds / Å^2	Molecular roughness / Å^2	Σ Pauling electronegativity / Å^2	HOMO eigenvalue (eV)	LUMO eigenvalue (eV)	HOMO/LUMO energy gap (absoulte value) (eV)	Number of atoms / Å^2	Number of lone-pair-donor atoms / Å^2	Number of sp2 carbon atoms / Å^2	Σ q_NBO (NBO partial atomic charges) Å^2 (a.u.)	Σ q_Mull (Mulliken partial atomic charges) Å^2 (a.u.)	Σ q_ESP (ESP-fitted partial atomic charges) Å^2 (a.u.)	Dipole moment (Debye)	Quadrupole moment (1/3 of trace of diagonalized matrix Q) (Debye×Å)	non-metal mole fraction	metal mole fraction	FDV (-. +) (finite dipole vertical) (kcal/mol)	FDV (+. -) (finite dipole vertical) (kcal/mol)	FDH 1 (finite dipole horizontal) (kcal/mol)	FDH 2 (finite dipole horizontal) (kcal/mol)
1	SiO2-quartz	0.433	0	1.13	-6.648	-6.302	0.346	0.377	0.26	0	-0.00538	-0.00495	-0.00075	68.177	-524.101	1	0	105.1	109.73	104.78	111.9
2	SiO2-amorph	0.368	0	1.1	-7.07551	-6.84857	0.226943	0.368	0.245	0	-5.3365e-08	2.66825e-08	-5.3365e-09	68.6398	-628.887	1	0	113.56	108.93	110.64	112.21
3	Anatase-OH-101	0.051	0.0129	0.973	-4.20389	-3.8866	0.317285	0.3603	0.212	0	0.0586943	0.0399929	0.0694067	116.15	-169.658	0.625	0.375	99.85	117.25	91.7	109.43
4	Rutile-OH-110	0.116	0.0498	1.1327	-5.35792	-5.14758	0.210344	0.4146	0.24	0	0.0326465	-0.00329806	0.0383317	33.5855	-763.76	0.7	0.3	106.16	116.52	112.95	108.61
5	Rutile-OH-100	0.1256	0.0264	1.665	-0.1869	-0.17274	0.01416	0.588	0.3835	0	-2.936e-18	1.98339e-08	6.61129e-09	244.018	-629.412	0.7	0.3	100.92	114.46	112.79	112.55
6	Fe2O3	0.426	0	0.92	-0.1491	-0.0879	0.0612	0.319	0.203	0	-0.0294558	-0.0326411	-0.00742369	355.106	-1124.46	0.6	0.4	114.37	109.94	107.03	118.54
7	CdSe-2m10	0.202407	0	0.372009	-3.527	-3.097	0.43	0.181	0.09	0	9.93886e-05	-0.00048	-7.48485e-05	409.52	-820.005	0.5	0.5	112.72	111.21	112.22	112.24
8	Au100	0.240484	0	0.396798	-4.4	-3.771	0.629	0.165333	0	0	-0.000297073	0.0127359	-0.000949482	5.139	-908.881	0	1	111.37	114.04	113.68	113.72
9	Ag100	0.239314	0	0.322076	-3.249	-2.62	0.629	0.169514	0	0	0.00216549	0.000179216	0.00022676	3.717	-631.088	0	1	110.36	116.43	114.83	114.58
10	Ag110	0.489206	0	0.428996	-3.178	-2.555	0.623	0.225787	0	0	0.0220959	-0.0249399	0.000658358	11.161	-983.401	0	1	114.55	114.47	116.01	115.46
11	Ag111	0.484	0	0.4	-3.273	-2.713	0.56	0.216	0	0	8.33962e-05	-0.000109685	-2.43707e-06	0.0859	-979.059	0	1	110.41	116.73	114.09	114.87
12	C-amorph	0.376	0	0.806	-5.876	-5.349	0.527	0.401693	0	0.0304	-0.00681415	-0.0130446	0.0818985	16.714	-1233.1	1	0	116.06	106.66	112.1	111.58
13	CNT-OH-low	0.079	0.039603	1.6	-5.40718	-4.88744	0.519738	0.634	0.039603	0.594	0.00389622	0.00303798	0.00461092	9.2778	-400.57	1	0	113.96	108.36	111.61	110.67
14	CNT-OH-high	0.1193	0.07954	1.75	-5.56582	-5.03819	0.527629	0.6761	0.07954	0.557	0.00261808	0.00203691	0.00329633	32.6149	-582.197	1	0	112.64	110.01	111.97	110.39
15	CNT-COO(-)-low	0.0155	0.0078	1.28	-4.857	-4.619	0.238	0.505	0.02	0.482	-0.00622108	-0.00309453	0.00277087	44.816	-923.491	1	0	102.48	120.57	115.16	107.92
16	CNT-COO(-)-high	0.119	0.05963	2	-3.86511	-3.32877	0.536337	0.736	0.11927	0.557	-0.0585397	-0.0589882	-0.0633415	26.6843	-1699.9	1	0	47.7075	171.318	112.38	112.46
17	CNT-15	0	0	1.32	-4.87846	-4.45151	0.426947	0.531	0	0.531	-0.00399628	-0.00396056	-0.00392064	13.6565	-463.457	1	0	114.72	109.15	112.02	111.8
18	CNT-NH2-low	0.026	0.008	1.25222	-5.219	-4.733	0.486	0.501909	0.008	0.476	0.000420753	0.00169816	0.00240585	20.644	-646.53	1	0	112.16	109.59	111.39	110.24
19	Graphene-oxide	0.0675	0.04728	1.35	-4.25858	-3.79871	0.459873	0.5268	0.04728	0.4187	-0.0301996	-0.012052	-0.0200442	6.1864	-399.864	1	0	108.45	113.94	111.73	111.06
20	Reduced-graphene-oxide	0.168	0.11	1.73849	-4.516	-3.256	1.26	0.659475	0.11	0.491	-0.0321207	-0.0182459	-0.0257511	2.471	-330.059	1	0	107.26	114.76	110.53	111.88
21	Graphene	0	0	1.17	-6.026	-5.597	0.429	0.469	0	0.469	0.0011876	-1.95383e-08	2.89225e-18	0.013	-481.646	1	0	116.13	107.97	112.88	112.54
22	CNT-COOH-low	0.034	0.0085	1.25	-5.207	-4.991	0.216	0.494	0.017	0.46	-0.00118337	0.00114921	0.00649614	10.999	-711.254	1	0	113.9	108.24	108.29	113.54
23	CNT-COOH-high	0.2535	0.0845	2.5	-5.35575	-4.90975	0.445995	0.9295	0.169	0.592	0.00391563	0.00171674	0.0031406	33.699	-630.086	1	0	116.63	105.72	111.94	110.01
24	CNT-NH2-high	0.167827	0.056	1.63817	-4.653	-4.211	0.442	0.661982	0.056	0.494	0.00278415	0.00386684	0.010587	22.034	-747.235	1	0	114.9	107.8	111.19	111.43
25	CNT-NH3(+)-low	0.0359994	0.00899986	1.34368	-5.4	-5.007	0.393	0.539992	0.00899986	0.503992	0.00954327	0.0109644	0.0125719	34.803	-739.64	1	0	123.03	99.66	106.81	115.61
26	CNT-NH3(+)-high	0.128407	0.0321017	1.52911	-5.773	-5.315	0.458	0.620634	0.0321017	0.492227	0.0316641	0.0289635	0.0305534	44.075	-371.26	1	0	138.85	83.76	108.38	114.83
27	Anatase-OH-100	0.253	0.0533	1.544	-0.23897	-0.22923	0.00974	0.5464	0.3465	0	-0.0298851	-0.057339	-0.0150649	57.8982	-523.966	0.73	0.27	109.63	111.84	113.06	109.96

## Sheet: AADescriptors
ID	Amino acids	MW	AMW	Sv	Se	Sp	Si	Mv	Me	Mp	Mi	GD	nAT	nSK	nBT	nBO	SCBO	RBF	nH	nC	H%	C%	N%	O%	Pol	LPRS	MSD	SPI	ECC	AECC	DECC	MDDD	UNIP	CENT	VAR	ICR	MaxTD	MeanTD	MaxDD	MeanDD	Wap	S1K	S2K	S3K	PHI	PW2	PW3	PW4	MAXDN
1	ALA	16.05	3.21	2.0536	4.7672	2.5228	5.8304	0.41072	0.95344	0.50456	1.16608	0	5	1	4	0	0	0	4	1	80	20	0	0	0	0	0	0	0	0	0	0	0	0	0	0	0	0	0	0	0	1	0	0	0	0	0	0	0
2	ARG	102.19	5.37842	9.4348	18.7816	10.4434	22.3633	0.496568	0.988505	0.549653	1.17702	0.285714	19	7	18	6	7	0.166667	12	4	63.1579	21.0526	15.7895	0	4	18.7379	2.79455	4.16632	29	4.14286	0.734694	2.73469	11	27	9	1.55666	5	2.47619	5	2.47619	52	6.75325	3.92706	5.75325	3.78863	0.502381	0.209416	0.0846861	1.3594
3	ASN	59.08	6.56444	4.7898	9.1963	4.983	10.5381	0.5322	1.02181	0.553667	1.1709	0.5	9	4	8	3	4	0	5	2	55.5556	22.2222	11.1111	11.1111	0	5.92693	1.58114	2.03933	7	1.75	0.375	0.75	3	6	2	0.811278	2	1.5	2	1.5	9	3.63636	1.01567	3.01436	0.92334	0.5	0	0	2
4	ASP	59.05	8.43571	4.2198	7.48	4.0511	8.0416	0.602829	1.06857	0.578729	1.1488	0.5	7	4	6	3	4	0	3	2	42.8571	28.5714	0	28.5714	0	5.92693	1.58114	2.03933	7	1.75	0.375	0.75	3	6	2	0.811278	2	1.5	2	1.5	9	3.48052	0.883661	2.85852	0.7689	0.5	0	0	2.75
5	CYS	48.12	8.02	3.2407	5.8436	4.1705	6.7504	0.540117	0.973933	0.695083	1.12507	1	6	2	5	1	1	0	4	1	66.6667	16.6667	0	0	0	0	1	0	2	1	0	0	1	0	0	0	1	1	1	1	1	2.35065	1.35065	1.80065	1.58745	0	0	0	0.305556
6	GLN	73.11	6.0925	6.3166	12.0799	6.7444	13.9533	0.526383	1.00666	0.562033	1.16277	0.4	12	5	11	4	5	0.0909091	7	3	58.3333	25	8.33333	8.33333	2	9.75731	1.94936	2.8036	13	2.6	0.48	1.36	5	11	4	0.970951	3	1.8	3	1.8	18	4.63636	1.91136	3.63636	1.77236	0.516667	0.2	0	1.91204
7	GLU	73.08	7.308	5.7466	10.3636	5.8125	11.4568	0.57466	1.03636	0.58125	1.14568	0.4	10	5	9	4	5	0.111111	5	3	50	30	0	20	2	9.75731	1.94936	2.8036	13	2.6	0.48	1.36	5	11	4	0.970951	3	1.8	3	1.8	18	4.48052	1.76783	3.48052	1.58416	0.516667	0.2	0	2.66204
8	ILE	58.14	4.15286	6.634	13.418	7.807	16.076	0.473857	0.958429	0.557643	1.14829	0.5	14	4	13	3	3	0.0769231	10	4	71.4286	28.5714	0	0	1	6.35611	1.82574	1.89302	10	2.5	0.5	1	4	4	2	1	3	1.66667	3	1.66667	10	4	3	3.378	3	0.416667	0.166667	0	0.180556
9	LEU	58.14	4.15286	6.634	13.418	7.807	16.076	0.473857	0.958429	0.557643	1.14829	0.5	14	4	13	3	3	0	10	4	71.4286	28.5714	0	0	0	5.92693	1.58114	2.03933	7	1.75	0.375	0.75	3	6	2	0.811278	2	1.5	2	1.5	9	4	1.33333	3.378	1.33333	0.5	0	0	0.5
10	LYS	74.17	4.36294	7.9188	16.4616	9.1934	19.7819	0.465812	0.968329	0.540788	1.16364	0.4	17	5	16	4	4	0.125	12	4	70.5882	23.5294	5.88235	0	2	10.2887	2.23607	2.52113	16	3.2	0.64	1.6	6	10	4	1.52193	4	2	4	2	20	4.96104	3.96104	3.96104	3.93017	0.433333	0.2	0.0666667	0.40625
11	PHE	92.15	6.14333	9.1072	14.5344	10.0456	16.6608	0.607147	0.96896	0.669707	1.11072	0.333333	15	7	15	7	10	0	8	7	53.3333	46.6667	0	0	5	17.3412	2.18218	2.22931	23	3.28571	0.408163	1.14286	10	14	5	0.863121	4	2	6	4.28571	131	4.38153	1.78383	1.0387	1.11656	0.538095	0.273565	0.125734	0.344907
12	PRO	42.09	4.67667	4.5804	8.6508	5.2842	10.2456	0.508933	0.9612	0.587133	1.1384	1	9	3	9	3	3	0	6	3	66.6667	33.3333	0	0	0	2.07944	1	0	3	1	0	0	2	0	0	0	1	1	2	2	9	1.33333	0.222222	0	0.0987654	0.5	0	0	0
13	SER	32.05	5.34167	2.7684	6.0945	2.9773	7.0398	0.4614	1.01575	0.496217	1.1733	1	6	2	5	1	1	0	4	1	66.6667	16.6667	0	16.6667	0	0	1	0	2	1	0	0	1	0	0	0	1	1	1	1	1	1.96104	0.961039	1.41104	0.942317	0	0	0	1
14	TRP	131.19	6.90474	12.1286	18.6362	13.0513	21.1591	0.638347	0.980853	0.686911	1.11364	0.244444	19	10	20	11	16	0	9	9	47.3684	47.3684	5.26316	0	12	30.4188	2.58199	3.01067	39	3.9	0.54	2.64	16	52	11	1.48548	5	2.35556	9	6.97778	698	5.68773	1.95841	0.792519	1.11389	0.57631	0.347727	0.189199	0.444444
15	TYR	108.15	6.75938	9.822	15.8617	10.5001	17.8702	0.613875	0.991356	0.656256	1.11689	0.285714	16	8	16	8	11	0	8	7	50	43.75	0	6.25	7	21.8258	2.44949	3.62747	30	3.75	0.75	2.25	14	12	6	1.5	5	2.21429	6	4.35714	182	5.32106	1.9689	1.3319	1.30958	0.566667	0.288462	0.12194	1.33741
[truncated: 67 more columns]

## Sheet: ExtraMoleculesDescriptors
ID	Biomolecules	MW	AMW	Sv	Se	Sp	Si	Mv	Me	Mp	Mi	GD	nAT	nSK	nBT	nBO	SCBO	RBF	nH	nC	H%	C%	N%	O%	Pol	LPRS	MSD	SPI	ECC	AECC	DECC	MDDD	UNIP	CENT	VAR	ICR	MaxTD	MeanTD	MaxDD	MeanDD	Wap	S1K	S2K	S3K	PHI	PW2	PW3	PW4	MAXDN
1	HID	82.12	6.84333	7.0964	11.9708	7.5342	13.827	0.591367	0.997567	0.62785	1.15225	0.4	12	6	12	6	8.5	0	6	4	50	33.3333	16.6667	0	2	12.8971	1.8619	1.89302	15	2.5	0.5	1	7	10	4	1	3	1.73333	5	3.6	79	3.56261	1.22722	0.666414	0.728686	0.544444	0.277493	0.125992	0.560185
2	HIE	82.12	6.84333	7.0964	11.9708	7.5342	13.827	0.591367	0.997567	0.62785	1.15225	0.4	12	6	12	6	8.5	0	6	4	50	33.3333	16.6667	0	2	12.8971	1.8619	1.89302	15	2.5	0.5	1	7	10	4	1	3	1.73333	5	3.6	79	3.56261	1.22722	0.666414	0.728686	0.544444	0.277493	0.125992	0.62963
3	THR	46.08	5.12	4.2952	8.9781	4.7387	10.455	0.477244	0.997567	0.526522	1.16167	0.666667	9	3	8	2	2	0	6	2	66.6667	22.2222	0	11.1111	0	2.89037	1.41421	1.17741	5	1.66667	0.444444	0.444444	2	2	1	0.918296	2	1.33333	2	1.33333	4	2.96104	1.96104	1.96104	1.93557	0.333333	0	0	1.25
4	VAL	44.11	4.01	5.1072	10.5344	6.0456	12.6608	0.464291	0.957673	0.5496	1.15098	0.666667	11	3	10	2	2	0	8	3	72.7273	27.2727	0	0	0	2.89037	1.41421	1.17741	5	1.66667	0.444444	0.444444	2	2	1	0.918296	2	1.33333	2	1.33333	4	3	2	2	2	0.333333	0	0	0.25
5	HIP	83.13	6.39462	7.3598	12.9126	7.9149	15.0346	0.566138	0.993277	0.608838	1.15651	0.4	13	6	13	6	8.5	0	7	4	53.8462	30.7692	15.3846	0	2	12.8971	1.8619	1.89302	15	2.5	0.5	1	7	10	4	1	3	1.73333	5	3.6	79	3.71322	1.32537	0.740535	0.82023	0.544444	0.277493	0.125992	0.50463
6	CYM	47.11	9.422	2.9773	4.9018	3.7898	5.5428	0.59546	0.98036	0.75796	1.10856	1	5	2	4	1	1	0	3	1	60	20	0	0	0	0	1	0	2	1	0	0	1	0	0	0	1	1	1	1	1	2.22078	1.22078	1.67078	1.35554	0	0	0	0.416667
7	DMEP	125.05	9.61923	7.6267	13.8764	8.1647	15.0145	0.586669	1.06742	0.628054	1.15496	0.285714	13	7	12	6	7	0.166667	6	2	46.1538	15.3846	0	30.7692	6	17.5503	2.26779	4.39362	22	3.14286	0.489796	2.20408	8	32	8	1.37878	4	2.09524	4	2.09524	44	6.96104	2.31488	2.63206	2.30199	0.57619	0.302381	0.0357143	4.70988
8	NC4	74.17	4.36294	7.9188	16.4616	9.1934	19.7819	0.465812	0.968329	0.540788	1.16364	0.4	17	5	16	4	4	0	12	4	70.5882	23.5294	5.88235	0	0	9.16993	1.67332	2.88405	9	1.8	0.32	0.96	4	12	3	0.721928	2	1.6	2	1.6	16	4.96104	0.977357	3.96104	0.969742	0.6	0	0	0.5
9	MAS	74.09	6.73545	6.01	11.3054	6.1932	12.6644	0.546364	1.02776	0.563018	1.15131	0.4	11	5	10	4	5	0.1	6	3	54.5455	27.2727	0	18.1818	2	9.75731	1.94936	2.8036	13	2.6	0.48	1.36	5	11	4	0.970951	3	1.8	3	1.8	18	4.63636	1.91136	3.63636	1.77236	0.516667	0.2	0	1.91204
10	MAMM	32.08	4.01	3.3384	7.8108	3.9092	9.5363	0.4173	0.97635	0.48865	1.19204	1	8	2	7	1	1	0	6	1	75	12.5	12.5	0	0	0	1	0	2	1	0	0	1	0	0	0	1	1	1	1	1	1.96104	0.961039	1.41104	0.942317	0	0	0	0.25
11	GLUP	74.09	6.73545	6.01	11.3054	6.1932	12.6644	0.546364	1.02776	0.563018	1.15131	0.4	11	5	10	4	5	0.1	6	3	54.5455	27.2727	0	18.1818	2	9.75731	1.94936	2.8036	13	2.6	0.48	1.36	5	11	4	0.970951	3	1.8	3	1.8	18	4.63636	1.91136	3.63636	1.77236	0.516667	0.2	0	2.41204
12	BGLC	180.18	7.5075	13.4496	25.2654	13.2954	27.7476	0.5604	1.05272	0.553975	1.15615	0.181818	24	12	24	12	12	0.0416667	12	6	50	25	0	25	19	40.7316	3.02515	7.79627	57	4.75	0.625	5.33333	24	76	18	1.48336	6	2.75758	8	4.87879	496	9.85122	3.65298	1.76482	2.99886	0.593254	0.381301	0.172591	2.90227
13	ASPP	60.06	7.5075	4.4832	8.4218	4.4318	9.2492	0.5604	1.05272	0.553975	1.15615	0.5	8	4	7	3	4	0	4	2	50	25	0	25	0	5.92693	1.58114	2.03933	7	1.75	0.375	0.75	3	6	2	0.811278	2	1.5	2	1.5	9	3.63636	1.01567	3.01436	0.92334	0.5	0	0	2.5
14	AFUC	164.18	7.13826	12.7348	23.9381	12.8409	26.5382	0.553687	1.04079	0.5583	1.15383	0.2	23	11	23	11	11	0	12	6	52.1739	26.087	0	21.7391	17	35.44	2.76997	7.15305	47	4.27273	0.528926	4.31405	20	60	11	1.32218	5	2.54545	7	4.72727	395	8.89774	3.04323	1.52288	2.46162	0.61039	0.377992	0.156534	2.76278
15	BGLCNA	221.24	7.37467	16.9978	31.2508	17.0625	34.6611	0.566593	1.04169	0.56875	1.15537	0.142857	30	15	30	15	16	0.0666667	15	8	50	26.6667	3.33333	20	23	57.4852	3.76955	10.3896	89	5.93333	1.13778	8.58667	34	198	31	2.23226	8	3.37143	9	5.33333	889	12.5108	4.97933	2.71852	4.15303	0.58373	0.34443	0.181025	2.78755
[truncated: 67 more columns]

## Sheet: ModelingData
ID	NM_AA/Biomolecule pair	Adsorption Energy [kT, T=298K]	Σ Pauling electronegativity / Å^2	Dipole moment (Debye)	Quadrupole moment (1/3 of trace of diagonalized matrix Q) (Debye×Å)	FDV_mean(kcal/mol)	FDH_mean(kcal/mol)	MW	ECC	UNIP	SAtot	Set (T - Train, V- Validation)
1	Ag111_TRP	-21.05	0.4	0.0859	-979.059	113.57	114.48	131.19	39	16	214.003	T
2	Ag111_ARG	-20.71	0.4	0.0859	-979.059	113.57	114.48	102.19	29	11	191.439	T
3	Au100_ARG	-17.76	0.396798	5.139	-908.881	112.705	113.7	102.19	29	11	191.439	T
4	Ag110_TRP	-16.74	0.428996	11.161	-983.401	114.51	115.735	131.19	39	16	214.003	T
5	Ag111_TYR	-14.81	0.4	0.0859	-979.059	113.57	114.48	108.15	30	14	214.671	T
6	Au100_TYR	-14.65	0.396798	5.139	-908.881	112.705	113.7	108.15	30	14	214.671	T
7	Au100_GLU	-13.98	0.396798	5.139	-908.881	112.705	113.7	73.08	13	5	126.361	T
8	Au100_LYS	-12.03	0.396798	5.139	-908.881	112.705	113.7	74.17	16	6	154.837	T
9	Au100_GLN	-10.75	0.396798	5.139	-908.881	112.705	113.7	73.11	13	5	132.962	T
10	Ag100_TYR	-10.21	0.322076	3.717	-631.088	113.395	114.705	108.15	30	14	214.671	T
11	Reduced-graphene-oxide_TRP	-9.96	1.73849	2.471	-330.059	111.01	111.205	131.19	39	16	214.003	T
12	Graphene_TRP	-9.41	1.17	0.013	-481.646	112.05	112.71	131.19	39	16	214.003	T
13	Reduced-graphene-oxide_TYR	-8.76	1.73849	2.471	-330.059	111.01	111.205	108.15	30	14	214.671	T
14	Ag110_TYR	-8.63	0.428996	11.161	-983.401	114.51	115.735	108.15	30	14	214.671	T
15	Graphene_TYR	-8.24	1.17	0.013	-481.646	112.05	112.71	108.15	30	14	214.671	T
16	Ag100_ARG	-8.1	0.322076	3.717	-631.088	113.395	114.705	102.19	29	11	191.439	T
17	CNT-OH-high_ASP	-7.02	1.75	32.6149	-582.197	111.325	111.18	59.05	7	3	100.285	T
18	Ag110_GLN	-6.86	0.428996	11.161	-983.401	114.51	115.735	73.11	13	5	132.962	T
19	Reduced-graphene-oxide_PHE	-6.82	1.73849	2.471	-330.059	111.01	111.205	92.15	23	10	186.293	T
20	Graphene_ARG	-6.55	1.17	0.013	-481.646	112.05	112.71	102.19	29	11	191.439	T
21	Ag111_GLN	-6.22	0.4	0.0859	-979.059	113.57	114.48	73.11	13	5	132.962	T
22	Ag110_ILE	-6.15	0.428996	11.161	-983.401	114.51	115.735	58.14	10	4	140.43	T
23	Graphene_PHE	-5.94	1.17	0.013	-481.646	112.05	112.71	92.15	23	10	186.293	T
24	Ag110_GLU	-5.88	0.428996	11.161	-983.401	114.51	115.735	73.08	13	5	126.361	T
25	Reduced-graphene-oxide_ARG	-5.78	1.73849	2.471	-330.059	111.01	111.205	102.19	29	11	191.439	T
26	CNT-OH-high_GLU	-5.65	1.75	32.6149	-582.197	111.325	111.18	73.08	13	5	126.361	T
27	CNT-COO(-)-low_TYR	-5.39	1.28	44.816	-923.491	111.525	111.54	108.15	30	14	214.671	T
28	Au100_PRO	-5.34	0.396798	5.139	-908.881	112.705	113.7	42.09	3	2	78.2302	T
29	Ag110_ASN	-5.26	0.428996	11.161	-983.401	114.51	115.735	59.08	7	3	106.885	T
30	CNT-COO(-)-low_TRP	-5.26	1.28	44.816	-923.491	111.525	111.54	131.19	39	16	214.003	T
31	Ag110_CYS	-4.82	0.428996	11.161	-983.401	114.51	115.735	48.12	2	1	91.8857	T
32	CNT-OH-low_GLU	-4.8	1.6	9.2778	-400.57	111.16	111.14	73.08	13	5	126.361	T
33	CNT-OH-low_TYR	-4.76	1.6	9.2778	-400.57	111.16	111.14	108.15	30	14	214.671	T
34	C-amorph_ARG	-4.76	0.806	16.714	-1233.1	111.36	111.84	102.19	29	11	191.439	T
35	Au100_SER	-4.65	0.396798	5.139	-908.881	112.705	113.7	32.05	2	1	82.5983	T
36	Au100_ALA	-4.56	0.396798	5.139	-908.881	112.705	113.7	16.05	0	0	62.2003	T
37	CNT-OH-low_ARG	-4.21	1.6	9.2778	-400.57	111.16	111.14	102.19	29	11	191.439	T
38	Reduced-graphene-oxide_ILE	-4.14	1.73849	2.471	-330.059	111.01	111.205	58.14	10	4	140.43	T
39	CNT-15_ARG	-4.09	1.32	13.6565	-463.457	111.935	111.91	102.19	29	11	191.439	T
40	CNT-COO(-)-low_ARG	-4.08	1.28	44.816	-923.491	111.525	111.54	102.19	29	11	191.439	T
41	CNT-NH2-low_TRP	-4.03	1.25222	20.644	-646.53	110.875	110.815	131.19	39	16	214.003	T
42	Reduced-graphene-oxide_LEU	-4.01	1.73849	2.471	-330.059	111.01	111.205	58.14	7	3	144.187	T
43	CNT-OH-low_TRP	-3.85	1.6	9.2778	-400.57	111.16	111.14	131.19	39	16	214.003	T
44	Ag111_CYS	-3.8	0.4	0.0859	-979.059	113.57	114.48	48.12	2	1	91.8857	T
45	CNT-NH2-low_ARG	-3.61	1.25222	20.644	-646.53	110.875	110.815	102.19	29	11	191.439	T
46	CNT-NH2-low_PRO	-3.57	1.25222	20.644	-646.53	110.875	110.815	42.09	3	2	78.2302	T
47	Ag110_ASP	-3.31	0.428996	11.161	-983.401	114.51	115.735	59.05	7	3	100.285	T
48	Ag111_ILE	-3.31	0.4	0.0859	-979.059	113.57	114.48	58.14	10	4	140.43	T
49	Ag100_PHE	-3.26	0.322076	3.717	-631.088	113.395	114.705	92.15	23	10	186.293	T
50	Ag111_LYS	-3.25	0.4	0.0859	-979.059	113.57	114.48	74.17	16	6	154.837	T
51	C-amorph_PRO	-3.11	0.806	16.714	-1233.1	111.36	111.84	42.09	3	2	78.2302	T
52	Graphene_ILE	-3.09	1.17	0.013	-481.646	112.05	112.71	58.14	10	4	140.43	T
53	CNT-15_PHE	-3.06	1.32	13.6565	-463.457	111.935	111.91	92.15	23	10	186.293	T
54	Graphene_GLN	-3.06	1.17	0.013	-481.646	112.05	112.71	73.11	13	5	132.962	T
55	Reduced-graphene-oxide_ASN	-2.94	1.73849	2.471	-330.059	111.01	111.205	59.08	7	3	106.885	T
56	CNT-COO(-)-low_PHE	-2.86	1.28	44.816	-923.491	111.525	111.54	92.15	23	10	186.293	T
57	CNT-COO(-)-low_PRO	-2.83	1.28	44.816	-923.491	111.525	111.54	42.09	3	2	78.2302	T
58	CNT-OH-low_PHE	-2.8	1.6	9.2778	-400.57	111.16	111.14	92.15	23	10	186.293	T
59	Graphene-oxide_PRO	-2.74	1.35	6.1864	-399.864	111.195	111.395	42.09	3	2	78.2302	T
60	C-amorph_PHE	-2.6	0.806	16.714	-1233.1	111.36	111.84	92.15	23	10	186.293	T
61	Au100_ASP	-2.58	0.396798	5.139	-908.881	112.705	113.7	59.05	7	3	100.285	T
62	Graphene_ASN	-2.57	1.17	0.013	-481.646	112.05	112.71	59.08	7	3	106.885	T
63	Graphene_LEU	-2.49	1.17	0.013	-481.646	112.05	112.71	58.14	7	3	144.187	T
64	C-amorph_ILE	-2.27	0.806	16.714	-1233.1	111.36	111.84	58.14	10	4	140.43	T
65	CNT-OH-high_PRO	-2.22	1.75	32.6149	-582.197	111.325	111.18	42.09	3	2	78.2302	T
66	CNT-15_GLN	-2.03	1.32	13.6565	-463.457	111.935	111.91	73.11	13	5	132.962	T
67	Ag111_ASP	-2.02	0.4	0.0859	-979.059	113.57	114.48	59.05	7	3	100.285	T
68	Reduced-graphene-oxide_LYS	-2	1.73849	2.471	-330.059	111.01	111.205	74.17	16	6	154.837	T
69	SiO2-quartz_TRP	-1.97	1.13	68.177	-524.101	107.415	108.34	131.19	39	16	214.003	T
70	SiO2-quartz_PHE	-1.92	1.13	68.177	-524.101	107.415	108.34	92.15	23	10	186.293	T
71	Ag111_LEU	-1.91	0.4	0.0859	-979.059	113.57	114.48	58.14	7	3	144.187	T
72	C-amorph_LEU	-1.84	0.806	16.714	-1233.1	111.36	111.84	58.14	7	3	144.187	T
73	Ag100_GLN	-1.8	0.322076	3.717	-631.088	113.395	114.705	73.11	13	5	132.962	T
74	Ag111_PRO	-1.75	0.4	0.0859	-979.059	113.57	114.48	42.09	3	2	78.2302	T
75	Anatase-OH-101_ASP	-1.73	0.973	116.15	-169.658	108.55	100.565	59.05	7	3	100.285	T
76	C-amorph_GLN	-1.71	0.806	16.714	-1233.1	111.36	111.84	73.11	13	5	132.962	T
77	Graphene-oxide_ASP	-1.65	1.35	6.1864	-399.864	111.195	111.395	59.05	7	3	100.285	T
78	SiO2-quartz_LEU	-1.65	1.13	68.177	-524.101	107.415	108.34	58.14	7	3	144.187	T
79	CNT-15_ILE	-1.64	1.32	13.6565	-463.457	111.935	111.91	58.14	10	4	140.43	T
80	CNT-15_ASN	-1.63	1.32	13.6565	-463.457	111.935	111.91	59.08	7	3	106.885	T
81	SiO2-amorph_PRO	-1.57	1.1	68.6398	-628.887	111.245	111.425	42.09	3	2	78.2302	T
82	CNT-NH2-low_ASN	-1.57	1.25222	20.644	-646.53	110.875	110.815	59.08	7	3	106.885	T
83	CNT-COO(-)-low_ILE	-1.51	1.28	44.816	-923.491	111.525	111.54	58.14	10	4	140.43	T
84	Graphene-oxide_TYR	-1.48	1.35	6.1864	-399.864	111.195	111.395	108.15	30	14	214.671	T
85	CNT-15_LEU	-1.43	1.32	13.6565	-463.457	111.935	111.91	58.14	7	3	144.187	T
86	CNT-OH-low_LEU	-1.43	1.6	9.2778	-400.57	111.16	111.14	58.14	7	3	144.187	T
87	C-amorph_LYS	-1.41	0.806	16.714	-1233.1	111.36	111.84	74.17	16	6	154.837	T
88	Ag100_ASN	-1.41	0.322076	3.717	-631.088	113.395	114.705	59.08	7	3	106.885	T
89	CNT-NH2-low_ILE	-1.34	1.25222	20.644	-646.53	110.875	110.815	58.14	10	4	140.43	T
90	SiO2-quartz_ARG	-1.34	1.13	68.177	-524.101	107.415	108.34	102.19	29	11	191.439	T
91	CNT-OH-low_ASN	-1.32	1.6	9.2778	-400.57	111.16	111.14	59.08	7	3	106.885	T
92	CNT-COO(-)-low_LEU	-1.31	1.28	44.816	-923.491	111.525	111.54	58.14	7	3	144.187	T
93	Graphene-oxide_LYS	-1.27	1.35	6.1864	-399.864	111.195	111.395	74.17	16	6	154.837	T
94	Graphene_GLU	-1.26	1.17	0.013	-481.646	112.05	112.71	73.08	13	5	126.361	T
95	CNT-OH-high_TRP	-1.19	1.75	32.6149	-582.197	111.325	111.18	131.19	39	16	214.003	T
96	CNT-COO(-)-low_ASN	-1.18	1.28	44.816	-923.491	111.525	111.54	59.08	7	3	106.885	T
97	C-amorph_GLU	-1.11	0.806	16.714	-1233.1	111.36	111.84	73.08	13	5	126.361	T
98	Reduced-graphene-oxide_SER	-1.11	1.73849	2.471	-330.059	111.01	111.205	32.05	2	1	82.5983	T
99	CNT-OH-high_GLN	-1.08	1.75	32.6149	-582.197	111.325	111.18	73.11	13	5	132.962	T
100	SiO2-quartz_GLN	-1.04	1.13	68.177	-524.101	107.415	108.34	73.11	13	5	132.962	T
101	CNT-OH-low_LYS	-1.01	1.6	9.2778	-400.57	111.16	111.14	74.17	16	6	154.837	T
102	SiO2-amorph_LEU	-1	1.1	68.6398	-628.887	111.245	111.425	58.14	7	3	144.187	T
103	SiO2-amorph_PHE	-0.97	1.1	68.6398	-628.887	111.245	111.425	92.15	23	10	186.293	T
104	SiO2-amorph_ILE	-0.96	1.1	68.6398	-628.887	111.245	111.425	58.14	10	4	140.43	T
105	C-amorph_CYS	-0.89	0.806	16.714	-1233.1	111.36	111.84	48.12	2	1	91.8857	T
106	CNT-15_GLU	-0.86	1.32	13.6565	-463.457	111.935	111.91	73.08	13	5	126.361	T
107	Graphene_SER	-0.82	1.17	0.013	-481.646	112.05	112.71	32.05	2	1	82.5983	T
108	SiO2-quartz_ASN	-0.81	1.13	68.177	-524.101	107.415	108.34	59.08	7	3	106.885	T
109	C-amorph_ASP	-0.77	0.806	16.714	-1233.1	111.36	111.84	59.05	7	3	100.285	T
110	Reduced-graphene-oxide_ALA	-0.72	1.73849	2.471	-330.059	111.01	111.205	16.05	0	0	62.2003	T
111	CNT-COO(-)-low_LYS	-0.71	1.28	44.816	-923.491	111.525	111.54	74.17	16	6	154.837	T
112	CNT-OH-high_TYR	-0.67	1.75	32.6149	-582.197	111.325	111.18	108.15	30	14	214.671	T
113	SiO2-quartz_CYS	-0.67	1.13	68.177	-524.101	107.415	108.34	48.12	2	1	91.8857	T
114	Rutile-OH-110_ARG	-0.66	1.1327	33.5855	-763.76	111.34	110.78	102.19	29	11	191.439	T
115	Graphene_ASP	-0.65	1.17	0.013	-481.646	112.05	112.71	59.05	7	3	100.285	T
116	SiO2-amorph_ASN	-0.62	1.1	68.6398	-628.887	111.245	111.425	59.08	7	3	106.885	T
117	Graphene-oxide_PHE	-0.61	1.35	6.1864	-399.864	111.195	111.395	92.15	23	10	186.293	T
118	C-amorph_SER	-0.58	0.806	16.714	-1233.1	111.36	111.84	32.05	2	1	82.5983	T
119	Ag111_SER	-0.53	0.4	0.0859	-979.059	113.57	114.48	32.05	2	1	82.5983	T
120	SiO2-quartz_LYS	-0.53	1.13	68.177	-524.101	107.415	108.34	74.17	16	6	154.837	T
121	CNT-OH-low_ASP	-0.5	1.6	9.2778	-400.57	111.16	111.14	59.05	7	3	100.285	T
122	Rutile-OH-100_GLU	-0.49	1.665	244.018	-629.412	107.69	112.67	73.08	13	5	126.361	T
123	SiO2-quartz_GLU	-0.46	1.13	68.177	-524.101	107.415	108.34	73.08	13	5	126.361	T
124	CNT-NH2-low_CYS	-0.45	1.25222	20.644	-646.53	110.875	110.815	48.12	2	1	91.8857	T
125	CNT-COO(-)-low_GLU	-0.42	1.28	44.816	-923.491	111.525	111.54	73.08	13	5	126.361	T
126	CNT-COO(-)-low_ASP	-0.42	1.28	44.816	-923.491	111.525	111.54	59.05	7	3	100.285	T
127	SiO2-amorph_LYS	-0.41	1.1	68.6398	-628.887	111.245	111.425	74.17	16	6	154.837	T
128	CNT-OH-low_CYS	-0.38	1.6	9.2778	-400.57	111.16	111.14	48.12	2	1	91.8857	T
129	CNT-OH-high_ASN	-0.36	1.75	32.6149	-582.197	111.325	111.18	59.08	7	3	106.885	T
130	Rutile-OH-100_ASP	-0.34	1.665	244.018	-629.412	107.69	112.67	59.05	7	3	100.285	T
131	CNT-NH2-low_GLU	-0.32	1.25222	20.644	-646.53	110.875	110.815	73.08	13	5	126.361	T
132	CNT-COO(-)-low_CYS	-0.3	1.28	44.816	-923.491	111.525	111.54	48.12	2	1	91.8857	T
133	C-amorph_ALA	-0.28	0.806	16.714	-1233.1	111.36	111.84	16.05	0	0	62.2003	T
134	SiO2-amorph_GLU	-0.26	1.1	68.6398	-628.887	111.245	111.425	73.08	13	5	126.361	T
135	SiO2-amorph_SER	-0.23	1.1	68.6398	-628.887	111.245	111.425	32.05	2	1	82.5983	T
136	SiO2-amorph_ALA	-0.22	1.1	68.6398	-628.887	111.245	111.425	16.05	0	0	62.2003	T
137	Graphene-oxide_ILE	-0.21	1.35	6.1864	-399.864	111.195	111.395	58.14	10	4	140.43	T
138	CNT-OH-low_SER	-0.2	1.6	9.2778	-400.57	111.16	111.14	32.05	2	1	82.5983	T
139	CNT-NH2-low_SER	-0.17	1.25222	20.644	-646.53	110.875	110.815	32.05	2	1	82.5983	T
140	SiO2-quartz_ASP	-0.16	1.13	68.177	-524.101	107.415	108.34	59.05	7	3	100.285	T
141	CNT-COO(-)-low_SER	-0.12	1.28	44.816	-923.491	111.525	111.54	32.05	2	1	82.5983	T
142	Anatase-OH-101_ARG	-0.12	0.973	116.15	-169.658	108.55	100.565	102.19	29	11	191.439	T
143	Ag100_GLU	-0.11	0.322076	3.717	-631.088	113.395	114.705	73.08	13	5	126.361	T
144	Fe2O3_PRO	-0.1	0.92	355.106	-1124.46	112.155	112.785	42.09	3	2	78.2302	T
145	Graphene-oxide_SER	-0.06	1.35	6.1864	-399.864	111.195	111.395	32.05	2	1	82.5983	T
146	CNT-15_ALA	-0.05	1.32	13.6565	-463.457	111.935	111.91	16.05	0	0	62.2003	T
147	Ag110_ALA	-0.02	0.428996	11.161	-983.401	114.51	115.735	16.05	0	0	62.2003	T
148	CNT-COO(-)-low_ALA	-0.02	1.28	44.816	-923.491	111.525	111.54	16.05	0	0	62.2003	T
149	SiO2-amorph_ASP	0	1.1	68.6398	-628.887	111.245	111.425	59.05	7	3	100.285	T
150	CdSe-2m10_PRO	0	0.372009	409.52	-820.005	111.965	112.23	42.09	3	2	78.2302	T
151	CNT-OH-high_SER	0.04	1.75	32.6149	-582.197	111.325	111.18	32.05	2	1	82.5983	T
152	CNT-OH-high_LEU	0.05	1.75	32.6149	-582.197	111.325	111.18	58.14	7	3	144.187	T
153	CdSe-2m10_SER	0.08	0.372009	409.52	-820.005	111.965	112.23	32.05	2	1	82.5983	T
154	CNT-NH2-low_ASP	0.1	1.25222	20.644	-646.53	110.875	110.815	59.05	7	3	100.285	T
155	CNT-NH2-low_ALA	0.13	1.25222	20.644	-646.53	110.875	110.815	16.05	0	0	62.2003	T
156	Rutile-OH-100_PRO	0.14	1.665	244.018	-629.412	107.69	112.67	42.09	3	2	78.2302	T
157	Fe2O3_GLU	0.16	0.92	355.106	-1124.46	112.155	112.785	73.08	13	5	126.361	T
158	Fe2O3_TRP	0.16	0.92	355.106	-1124.46	112.155	112.785	131.19	39	16	214.003	T
159	Rutile-OH-110_PRO	0.18	1.1327	33.5855	-763.76	111.34	110.78	42.09	3	2	78.2302	T
160	Fe2O3_ASN	0.2	0.92	355.106	-1124.46	112.155	112.785	59.08	7	3	106.885	T
161	Ag100_PRO	0.21	0.322076	3.717	-631.088	113.395	114.705	42.09	3	2	78.2302	T
162	Graphene-oxide_ALA	0.22	1.35	6.1864	-399.864	111.195	111.395	16.05	0	0	62.2003	T
163	Ag100_SER	0.22	0.322076	3.717	-631.088	113.395	114.705	32.05	2	1	82.5983	T
164	Fe2O3_PHE	0.23	0.92	355.106	-1124.46	112.155	112.785	92.15	23	10	186.293	T
165	Fe2O3_LYS	0.25	0.92	355.106	-1124.46	112.155	112.785	74.17	16	6	154.837	T
166	Anatase-OH-101_GLN	0.26	0.973	116.15	-169.658	108.55	100.565	73.11	13	5	132.962	T
167	CdSe-2m10_ASN	0.27	0.372009	409.52	-820.005	111.965	112.23	59.08	7	3	106.885	T
168	CdSe-2m10_ILE	0.27	0.372009	409.52	-820.005	111.965	112.23	58.14	10	4	140.43	T
169	Ag111_ALA	0.29	0.4	0.0859	-979.059	113.57	114.48	16.05	0	0	62.2003	T
170	CdSe-2m10_GLN	0.29	0.372009	409.52	-820.005	111.965	112.23	73.11	13	5	132.962	T
171	Fe2O3_CYS	0.3	0.92	355.106	-1124.46	112.155	112.785	48.12	2	1	91.8857	T
172	Rutile-OH-110_ASN	0.31	1.1327	33.5855	-763.76	111.34	110.78	59.08	7	3	106.885	T
173	CdSe-2m10_CYS	0.33	0.372009	409.52	-820.005	111.965	112.23	48.12	2	1	91.8857	T
174	Fe2O3_ILE	0.33	0.92	355.106	-1124.46	112.155	112.785	58.14	10	4	140.43	T
175	CNT-OH-high_ALA	0.33	1.75	32.6149	-582.197	111.325	111.18	16.05	0	0	62.2003	T
176	Rutile-OH-100_GLN	0.34	1.665	244.018	-629.412	107.69	112.67	73.11	13	5	132.962	T
177	Rutile-OH-110_TYR	0.36	1.1327	33.5855	-763.76	111.34	110.78	108.15	30	14	214.671	T
178	CdSe-2m10_TRP	0.36	0.372009	409.52	-820.005	111.965	112.23	131.19	39	16	214.003	T
179	Rutile-OH-110_GLN	0.37	1.1327	33.5855	-763.76	111.34	110.78	73.11	13	5	132.962	T
180	Rutile-OH-110_SER	0.37	1.1327	33.5855	-763.76	111.34	110.78	32.05	2	1	82.5983	T
181	Ag100_ALA	0.4	0.322076	3.717	-631.088	113.395	114.705	16.05	0	0	62.2003	T
182	Rutile-OH-100_SER	0.41	1.665	244.018	-629.412	107.69	112.67	32.05	2	1	82.5983	T
183	Rutile-OH-100_TRP	0.42	1.665	244.018	-629.412	107.69	112.67	131.19	39	16	214.003	T
184	Anatase-OH-101_SER	0.44	0.973	116.15	-169.658	108.55	100.565	32.05	2	1	82.5983	T
185	Rutile-OH-110_ALA	0.45	1.1327	33.5855	-763.76	111.34	110.78	16.05	0	0	62.2003	T
186	Rutile-OH-100_CYS	0.46	1.665	244.018	-629.412	107.69	112.67	48.12	2	1	91.8857	T
187	Anatase-OH-101_TYR	0.46	0.973	116.15	-169.658	108.55	100.565	108.15	30	14	214.671	T
188	CdSe-2m10_ASP	0.46	0.372009	409.52	-820.005	111.965	112.23	59.05	7	3	100.285	T
189	Rutile-OH-110_TRP	0.49	1.1327	33.5855	-763.76	111.34	110.78	131.19	39	16	214.003	T
190	Rutile-OH-110_ASP	0.49	1.1327	33.5855	-763.76	111.34	110.78	59.05	7	3	100.285	T
191	CdSe-2m10_PHE	0.51	0.372009	409.52	-820.005	111.965	112.23	92.15	23	10	186.293	T
192	CdSe-2m10_TYR	0.51	0.372009	409.52	-820.005	111.965	112.23	108.15	30	14	214.671	T
193	Rutile-OH-100_PHE	0.52	1.665	244.018	-629.412	107.69	112.67	92.15	23	10	186.293	T
194	Rutile-OH-100_ALA	0.53	1.665	244.018	-629.412	107.69	112.67	16.05	0	0	62.2003	T
195	Rutile-OH-110_LEU	0.55	1.1327	33.5855	-763.76	111.34	110.78	58.14	7	3	144.187	T
196	CdSe-2m10_LYS	0.55	0.372009	409.52	-820.005	111.965	112.23	74.17	16	6	154.837	T
197	Rutile-OH-110_GLU	0.57	1.1327	33.5855	-763.76	111.34	110.78	73.08	13	5	126.361	T
198	Anatase-OH-101_ALA	0.59	0.973	116.15	-169.658	108.55	100.565	16.05	0	0	62.2003	T
199	Anatase-OH-101_PHE	0.62	0.973	116.15	-169.658	108.55	100.565	92.15	23	10	186.293	T
200	Anatase-OH-101_LEU	0.7	0.973	116.15	-169.658	108.55	100.565	58.14	7	3	144.187	T
201	Au100_PHE	-18.05	0.396798	5.139	-908.881	112.705	113.7	92.15	23	10	186.293	V
202	Ag110_ARG	-16.06	0.428996	11.161	-983.401	114.51	115.735	102.19	29	11	191.439	V
203	Au100_ASN	-14.06	0.396798	5.139	-908.881	112.705	113.7	59.08	7	3	106.885	V
204	Au100_TRP	-11.45	0.396798	5.139	-908.881	112.705	113.7	131.19	39	16	214.003	V
205	Ag111_PHE	-10.15	0.4	0.0859	-979.059	113.57	114.48	92.15	23	10	186.293	V
206	Ag100_TRP	-9.35	0.322076	3.717	-631.088	113.395	114.705	131.19	39	16	214.003	V
207	Ag110_LYS	-8.38	0.428996	11.161	-983.401	114.51	115.735	74.17	16	6	154.837	V
208	Au100_CYS	-7.93	0.396798	5.139	-908.881	112.705	113.7	48.12	2	1	91.8857	V
209	Au100_ILE	-6.85	0.396798	5.139	-908.881	112.705	113.7	58.14	10	4	140.43	V
210	Ag110_PHE	-6.54	0.428996	11.161	-983.401	114.51	115.735	92.15	23	10	186.293	V
211	Au100_LEU	-5.99	0.396798	5.139	-908.881	112.705	113.7	58.14	7	3	144.187	V
212	Reduced-graphene-oxide_PRO	-5.86	1.73849	2.471	-330.059	111.01	111.205	42.09	3	2	78.2302	V
213	Ag111_ASN	-5.52	0.4	0.0859	-979.059	113.57	114.48	59.08	7	3	106.885	V
214	Graphene_PRO	-5.28	1.17	0.013	-481.646	112.05	112.71	42.09	3	2	78.2302	V
215	CNT-15_TYR	-4.82	1.32	13.6565	-463.457	111.935	111.91	108.15	30	14	214.671	V
216	CNT-15_TRP	-4.78	1.32	13.6565	-463.457	111.935	111.91	131.19	39	16	214.003	V
217	Ag110_LEU	-4.67	0.428996	11.161	-983.401	114.51	115.735	58.14	7	3	144.187	V
218	CNT-NH2-low_TYR	-4.25	1.25222	20.644	-646.53	110.875	110.815	108.15	30	14	214.671	V
219	C-amorph_TRP	-4.09	0.806	16.714	-1233.1	111.36	111.84	131.19	39	16	214.003	V
220	C-amorph_TYR	-4.07	0.806	16.714	-1233.1	111.36	111.84	108.15	30	14	214.671	V
221	Graphene-oxide_GLU	-3.89	1.35	6.1864	-399.864	111.195	111.395	73.08	13	5	126.361	V
222	Reduced-graphene-oxide_GLN	-3.62	1.73849	2.471	-330.059	111.01	111.205	73.11	13	5	132.962	V
223	CNT-15_PRO	-3.55	1.32	13.6565	-463.457	111.935	111.91	42.09	3	2	78.2302	V
224	CNT-OH-low_PRO	-3.27	1.6	9.2778	-400.57	111.16	111.14	42.09	3	2	78.2302	V
225	Anatase-OH-101_GLU	-3.17	0.973	116.15	-169.658	108.55	100.565	73.08	13	5	126.361	V
226	Ag111_GLU	-3.07	0.4	0.0859	-979.059	113.57	114.48	73.08	13	5	126.361	V
227	Graphene-oxide_ARG	-2.95	1.35	6.1864	-399.864	111.195	111.395	102.19	29	11	191.439	V
228	SiO2-quartz_TYR	-2.84	1.13	68.177	-524.101	107.415	108.34	108.15	30	14	214.671	V
229	CNT-OH-high_ARG	-2.78	1.75	32.6149	-582.197	111.325	111.18	102.19	29	11	191.439	V
230	CNT-NH2-low_PHE	-2.6	1.25222	20.644	-646.53	110.875	110.815	92.15	23	10	186.293	V
231	Ag110_PRO	-2.53	0.428996	11.161	-983.401	114.51	115.735	42.09	3	2	78.2302	V
232	C-amorph_ASN	-2.22	0.806	16.714	-1233.1	111.36	111.84	59.08	7	3	106.885	V
233	Graphene_LYS	-2.02	1.17	0.013	-481.646	112.05	112.71	74.17	16	6	154.837	V
234	SiO2-quartz_PRO	-2	1.13	68.177	-524.101	107.415	108.34	42.09	3	2	78.2302	V
235	CNT-OH-low_GLN	-1.91	1.6	9.2778	-400.57	111.16	111.14	73.11	13	5	132.962	V
236	SiO2-amorph_TRP	-1.83	1.1	68.6398	-628.887	111.245	111.425	131.19	39	16	214.003	V
237	SiO2-quartz_ILE	-1.75	1.13	68.177	-524.101	107.415	108.34	58.14	10	4	140.43	V
238	CNT-COO(-)-low_GLN	-1.7	1.28	44.816	-923.491	111.525	111.54	73.11	13	5	132.962	V
239	Reduced-graphene-oxide_CYS	-1.65	1.73849	2.471	-330.059	111.01	111.205	48.12	2	1	91.8857	V
240	Reduced-graphene-oxide_GLU	-1.62	1.73849	2.471	-330.059	111.01	111.205	73.08	13	5	126.361	V
241	Graphene-oxide_TRP	-1.51	1.35	6.1864	-399.864	111.195	111.395	131.19	39	16	214.003	V
242	SiO2-amorph_TYR	-1.47	1.1	68.6398	-628.887	111.245	111.425	108.15	30	14	214.671	V
243	CNT-NH2-low_GLN	-1.41	1.25222	20.644	-646.53	110.875	110.815	73.11	13	5	132.962	V
244	CNT-NH2-low_LEU	-1.35	1.25222	20.644	-646.53	110.875	110.815	58.14	7	3	144.187	V
245	CNT-OH-high_LYS	-1.33	1.75	32.6149	-582.197	111.325	111.18	74.17	16	6	154.837	V
246	CNT-OH-low_ILE	-1.3	1.6	9.2778	-400.57	111.16	111.14	58.14	10	4	140.43	V
247	Ag110_SER	-1.21	0.428996	11.161	-983.401	114.51	115.735	32.05	2	1	82.5983	V
248	Graphene_CYS	-1.12	1.17	0.013	-481.646	112.05	112.71	48.12	2	1	91.8857	V
249	Graphene-oxide_GLN	-1.09	1.35	6.1864	-399.864	111.195	111.395	73.11	13	5	132.962	V
250	SiO2-amorph_ARG	-1.02	1.1	68.6398	-628.887	111.245	111.425	102.19	29	11	191.439	V
251	Graphene-oxide_ASN	-0.97	1.35	6.1864	-399.864	111.195	111.395	59.08	7	3	106.885	V
252	Rutile-OH-110_LYS	-0.94	1.1327	33.5855	-763.76	111.34	110.78	74.17	16	6	154.837	V
253	SiO2-amorph_GLN	-0.83	1.1	68.6398	-628.887	111.245	111.425	73.11	13	5	132.962	V
254	Ag100_CYS	-0.77	0.322076	3.717	-631.088	113.395	114.705	48.12	2	1	91.8857	V
255	CNT-15_LYS	-0.72	1.32	13.6565	-463.457	111.935	111.91	74.17	16	6	154.837	V
256	Reduced-graphene-oxide_ASP	-0.67	1.73849	2.471	-330.059	111.01	111.205	59.05	7	3	100.285	V
257	Rutile-OH-100_LYS	-0.65	1.665	244.018	-629.412	107.69	112.67	74.17	16	6	154.837	V
258	Rutile-OH-100_ARG	-0.62	1.665	244.018	-629.412	107.69	112.67	102.19	29	11	191.439	V
259	CNT-NH2-low_LYS	-0.53	1.25222	20.644	-646.53	110.875	110.815	74.17	16	6	154.837	V
260	SiO2-amorph_CYS	-0.52	1.1	68.6398	-628.887	111.245	111.425	48.12	2	1	91.8857	V
261	SiO2-quartz_ALA	-0.47	1.13	68.177	-524.101	107.415	108.34	16.05	0	0	62.2003	V
262	CNT-OH-high_PHE	-0.44	1.75	32.6149	-582.197	111.325	111.18	92.15	23	10	186.293	V
263	SiO2-quartz_SER	-0.42	1.13	68.177	-524.101	107.415	108.34	32.05	2	1	82.5983	V
264	CNT-15_CYS	-0.36	1.32	13.6565	-463.457	111.935	111.91	48.12	2	1	91.8857	V
265	Anatase-OH-101_LYS	-0.33	0.973	116.15	-169.658	108.55	100.565	74.17	16	6	154.837	V
266	Graphene_ALA	-0.28	1.17	0.013	-481.646	112.05	112.71	16.05	0	0	62.2003	V
267	Ag100_LYS	-0.25	0.322076	3.717	-631.088	113.395	114.705	74.17	16	6	154.837	V
268	Graphene-oxide_LEU	-0.21	1.35	6.1864	-399.864	111.195	111.395	58.14	7	3	144.187	V
269	Graphene-oxide_CYS	-0.18	1.35	6.1864	-399.864	111.195	111.395	48.12	2	1	91.8857	V
270	CNT-15_SER	-0.16	1.32	13.6565	-463.457	111.935	111.91	32.05	2	1	82.5983	V
271	Ag100_ASP	-0.11	0.322076	3.717	-631.088	113.395	114.705	59.05	7	3	100.285	V
272	CNT-OH-high_ILE	-0.07	1.75	32.6149	-582.197	111.325	111.18	58.14	10	4	140.43	V
273	Ag100_LEU	-0.05	0.322076	3.717	-631.088	113.395	114.705	58.14	7	3	144.187	V
274	CNT-15_ASP	0	1.32	13.6565	-463.457	111.935	111.91	59.05	7	3	100.285	V
275	CNT-OH-high_CYS	0.03	1.75	32.6149	-582.197	111.325	111.18	48.12	2	1	91.8857	V
276	CNT-OH-low_ALA	0.06	1.6	9.2778	-400.57	111.16	111.14	16.05	0	0	62.2003	V
277	Ag100_ILE	0.13	0.322076	3.717	-631.088	113.395	114.705	58.14	10	4	140.43	V
278	Anatase-OH-101_ASN	0.15	0.973	116.15	-169.658	108.55	100.565	59.08	7	3	106.885	V
279	Fe2O3_TYR	0.17	0.92	355.106	-1124.46	112.155	112.785	108.15	30	14	214.671	V
280	Fe2O3_GLN	0.2	0.92	355.106	-1124.46	112.155	112.785	73.11	13	5	132.962	V
281	Rutile-OH-100_ASN	0.22	1.665	244.018	-629.412	107.69	112.67	59.08	7	3	106.885	V
282	Fe2O3_SER	0.25	0.92	355.106	-1124.46	112.155	112.785	32.05	2	1	82.5983	V
283	Fe2O3_ASP	0.26	0.92	355.106	-1124.46	112.155	112.785	59.05	7	3	100.285	V
284	Fe2O3_LEU	0.28	0.92	355.106	-1124.46	112.155	112.785	58.14	7	3	144.187	V
285	Anatase-OH-101_PRO	0.29	0.973	116.15	-169.658	108.55	100.565	42.09	3	2	78.2302	V
286	CdSe-2m10_ALA	0.32	0.372009	409.52	-820.005	111.965	112.23	16.05	0	0	62.2003	V
287	CdSe-2m10_LEU	0.33	0.372009	409.52	-820.005	111.965	112.23	58.14	7	3	144.187	V
288	Fe2O3_ARG	0.35	0.92	355.106	-1124.46	112.155	112.785	102.19	29	11	191.439	V
289	Fe2O3_ALA	0.36	0.92	355.106	-1124.46	112.155	112.785	16.05	0	0	62.2003	V
290	Rutile-OH-110_CYS	0.4	1.1327	33.5855	-763.76	111.34	110.78	48.12	2	1	91.8857	V
291	Rutile-OH-100_TYR	0.41	1.665	244.018	-629.412	107.69	112.67	108.15	30	14	214.671	V
292	CdSe-2m10_GLU	0.45	0.372009	409.52	-820.005	111.965	112.23	73.08	13	5	126.361	V
293	Rutile-OH-110_PHE	0.46	1.1327	33.5855	-763.76	111.34	110.78	92.15	23	10	186.293	V
294	Rutile-OH-110_ILE	0.47	1.1327	33.5855	-763.76	111.34	110.78	58.14	10	4	140.43	V
295	Anatase-OH-101_TRP	0.5	0.973	116.15	-169.658	108.55	100.565	131.19	39	16	214.003	V
296	Anatase-OH-101_CYS	0.51	0.973	116.15	-169.658	108.55	100.565	48.12	2	1	91.8857	V
297	CdSe-2m10_ARG	0.55	0.372009	409.52	-820.005	111.965	112.23	102.19	29	11	191.439	V
298	Rutile-OH-100_ILE	0.55	1.665	244.018	-629.412	107.69	112.67	58.14	10	4	140.43	V
299	Rutile-OH-100_LEU	0.59	1.665	244.018	-629.412	107.69	112.67	58.14	7	3	144.187	V
300	Anatase-OH-101_ILE	0.68	0.973	116.15	-169.658	108.55	100.565	58.14	10	4	140.43	V

## Sheet: ExtraValidationSet
ID	NM_AA/Biomolecule pair	Adsorption Energy [kT, T=298K]	Σ Pauling electronegativity / Å^2	Dipole moment (Debye)	Quadrupole moment (1/3 of trace of diagonalized matrix Q) (Debye×Å)	FDV_mean(kcal/mol)	FDH_mean(kcal/mol)	MW	ECC	UNIP	SAtot
1	SiO2-quartz_HID	-1.43358	1.13	68.177	-524.101	107.415	108.34	82.12	15	7	121.675
2	SiO2-quartz_HIE	-1.39701	1.13	68.177	-524.101	107.415	108.34	82.12	15	7	121.675
3	SiO2-quartz_THR	-0.713946	1.13	68.177	-524.101	107.415	108.34	46.08	5	2	110.364
4	SiO2-quartz_VAL	-1.17726	1.13	68.177	-524.101	107.415	108.34	44.11	5	2	114.354
5	SiO2-quartz_HIP	-0.736486	1.13	68.177	-524.101	107.415	108.34	83.13	15	7	121.675
6	SiO2-quartz_CYM	-0.0147862	1.13	68.177	-524.101	107.415	108.34	47.11	2	1	88.6108
7	SiO2-quartz_DMEP	-0.252139	1.13	68.177	-524.101	107.415	108.34	125.05	22	8	164.987
8	SiO2-quartz_NC4	0.0499347	1.13	68.177	-524.101	107.415	108.34	74.17	9	4	174.839
9	SiO2-quartz_MAS	-1.45157	1.13	68.177	-524.101	107.415	108.34	74.09	13	5	133.671
10	SiO2-quartz_MAMM	0.209787	1.13	68.177	-524.101	107.415	108.34	32.08	2	1	76.6069
11	SiO2-quartz_GLUP	-1.16021	1.13	68.177	-524.101	107.415	108.34	74.09	13	5	138.953
12	SiO2-quartz_BGLC	-1.56686	1.13	68.177	-524.101	107.415	108.34	180.18	57	24	306.814
13	SiO2-amorph_HID	-1.19513	1.1	68.6398	-628.887	111.245	111.425	82.12	15	7	121.675
14	SiO2-amorph_HIE	-1.05303	1.1	68.6398	-628.887	111.245	111.425	82.12	15	7	121.675
15	SiO2-amorph_THR	-0.504797	1.1	68.6398	-628.887	111.245	111.425	46.08	5	2	110.364
16	SiO2-amorph_VAL	-0.767243	1.1	68.6398	-628.887	111.245	111.425	44.11	5	2	114.354
17	SiO2-amorph_HIP	-0.889263	1.1	68.6398	-628.887	111.245	111.425	83.13	15	7	121.675
18	SiO2-amorph_CYM	0.0914824	1.1	68.6398	-628.887	111.245	111.425	47.11	2	1	88.6108
19	SiO2-amorph_DMEP	-0.365143	1.1	68.6398	-628.887	111.245	111.425	125.05	22	8	164.987
20	SiO2-amorph_NC4	-0.233345	1.1	68.6398	-628.887	111.245	111.425	74.17	9	4	174.839
21	SiO2-amorph_MAS	-1.16255	1.1	68.6398	-628.887	111.245	111.425	74.09	13	5	133.671
22	SiO2-amorph_MAMM	0.236749	1.1	68.6398	-628.887	111.245	111.425	32.08	2	1	76.6069
23	SiO2-amorph_GLUP	-0.893479	1.1	68.6398	-628.887	111.245	111.425	74.09	13	5	138.953
24	SiO2-amorph_BGLC	-1.74771	1.1	68.6398	-628.887	111.245	111.425	180.18	57	24	306.814
25	Anatase-OH-101_HID	0.37125	0.973	116.15	-169.658	108.55	100.565	82.12	15	7	121.675
26	Anatase-OH-101_HIE	0.417544	0.973	116.15	-169.658	108.55	100.565	82.12	15	7	121.675
27	Anatase-OH-101_THR	0.485557	0.973	116.15	-169.658	108.55	100.565	46.08	5	2	110.364
28	Anatase-OH-101_VAL	0.639821	0.973	116.15	-169.658	108.55	100.565	44.11	5	2	114.354
29	Anatase-OH-101_HIP	0.0544796	0.973	116.15	-169.658	108.55	100.565	83.13	15	7	121.675
30	Anatase-OH-101_CYM	-2.88052	0.973	116.15	-169.658	108.55	100.565	47.11	2	1	88.6108
31	Anatase-OH-101_DMEP	9.38408e-05	0.973	116.15	-169.658	108.55	100.565	125.05	22	8	164.987
32	Anatase-OH-101_NC4	0.481362	0.973	116.15	-169.658	108.55	100.565	74.17	9	4	174.839
33	Anatase-OH-101_MAS	0.559965	0.973	116.15	-169.658	108.55	100.565	74.09	13	5	133.671
34	Anatase-OH-101_MAMM	-0.682553	0.973	116.15	-169.658	108.55	100.565	32.08	2	1	76.6069
35	Anatase-OH-101_GLUP	0.335359	0.973	116.15	-169.658	108.55	100.565	74.09	13	5	138.953
36	Anatase-OH-101_BGLC	-0.758491	0.973	116.15	-169.658	108.55	100.565	180.18	57	24	306.814
37	Rutile-OH-110_HID	0.336829	1.1327	33.5855	-763.76	111.34	110.78	82.12	15	7	121.675
38	Rutile-OH-110_HIE	0.358492	1.1327	33.5855	-763.76	111.34	110.78	82.12	15	7	121.675
39	Rutile-OH-110_THR	0.281117	1.1327	33.5855	-763.76	111.34	110.78	46.08	5	2	110.364
40	Rutile-OH-110_VAL	0.469944	1.1327	33.5855	-763.76	111.34	110.78	44.11	5	2	114.354
41	Rutile-OH-110_HIP	-0.757941	1.1327	33.5855	-763.76	111.34	110.78	83.13	15	7	121.675
42	Rutile-OH-110_CYM	0.316506	1.1327	33.5855	-763.76	111.34	110.78	47.11	2	1	88.6108
43	Rutile-OH-110_DMEP	-0.200288	1.1327	33.5855	-763.76	111.34	110.78	125.05	22	8	164.987
44	Rutile-OH-110_NC4	-0.30759	1.1327	33.5855	-763.76	111.34	110.78	74.17	9	4	174.839
45	Rutile-OH-110_MAS	0.378988	1.1327	33.5855	-763.76	111.34	110.78	74.09	13	5	133.671
46	Rutile-OH-110_MAMM	-0.943146	1.1327	33.5855	-763.76	111.34	110.78	32.08	2	1	76.6069
47	Rutile-OH-110_GLUP	0.175429	1.1327	33.5855	-763.76	111.34	110.78	74.09	13	5	138.953
48	Rutile-OH-110_BGLC	-1.68199	1.1327	33.5855	-763.76	111.34	110.78	180.18	57	24	306.814
49	Rutile-OH-100_HID	0.291501	1.665	244.018	-629.412	107.69	112.67	82.12	15	7	121.675
50	Rutile-OH-100_HIE	0.261009	1.665	244.018	-629.412	107.69	112.67	82.12	15	7	121.675
51	Rutile-OH-100_THR	0.416504	1.665	244.018	-629.412	107.69	112.67	46.08	5	2	110.364
52	Rutile-OH-100_VAL	0.576193	1.665	244.018	-629.412	107.69	112.67	44.11	5	2	114.354
53	Rutile-OH-100_HIP	-0.6761	1.665	244.018	-629.412	107.69	112.67	83.13	15	7	121.675
54	Rutile-OH-100_CYM	-0.235376	1.665	244.018	-629.412	107.69	112.67	47.11	2	1	88.6108
55	Rutile-OH-100_DMEP	-0.229211	1.665	244.018	-629.412	107.69	112.67	125.05	22	8	164.987
56	Rutile-OH-100_NC4	-0.0634065	1.665	244.018	-629.412	107.69	112.67	74.17	9	4	174.839
57	Rutile-OH-100_MAS	0.45617	1.665	244.018	-629.412	107.69	112.67	74.09	13	5	133.671
58	Rutile-OH-100_MAMM	-0.987865	1.665	244.018	-629.412	107.69	112.67	32.08	2	1	76.6069
59	Rutile-OH-100_GLUP	0.264348	1.665	244.018	-629.412	107.69	112.67	74.09	13	5	138.953
60	Rutile-OH-100_BGLC	-1.04891	1.665	244.018	-629.412	107.69	112.67	180.18	57	24	306.814
61	Fe2O3_HID	0.104679	0.92	355.106	-1124.46	112.155	112.785	82.12	15	7	121.675
62	Fe2O3_HIE	0.209569	0.92	355.106	-1124.46	112.155	112.785	82.12	15	7	121.675
63	Fe2O3_THR	0.287664	0.92	355.106	-1124.46	112.155	112.785	46.08	5	2	110.364
64	Fe2O3_VAL	0.312438	0.92	355.106	-1124.46	112.155	112.785	44.11	5	2	114.354
65	Fe2O3_HIP	0.337858	0.92	355.106	-1124.46	112.155	112.785	83.13	15	7	121.675
66	Fe2O3_CYM	-0.195048	0.92	355.106	-1124.46	112.155	112.785	47.11	2	1	88.6108
67	Fe2O3_DMEP	-0.0200389	0.92	355.106	-1124.46	112.155	112.785	125.05	22	8	164.987
68	Fe2O3_NC4	0.395367	0.92	355.106	-1124.46	112.155	112.785	74.17	9	4	174.839
69	Fe2O3_MAS	0.271486	0.92	355.106	-1124.46	112.155	112.785	74.09	13	5	133.671
70	Fe2O3_MAMM	0.414951	0.92	355.106	-1124.46	112.155	112.785	32.08	2	1	76.6069
71	Fe2O3_GLUP	0.121298	0.92	355.106	-1124.46	112.155	112.785	74.09	13	5	138.953
72	Fe2O3_BGLC	-0.669523	0.92	355.106	-1124.46	112.155	112.785	180.18	57	24	306.814
73	CdSe-2m10_HID	0.48369	0.372009	409.52	-820.005	111.965	112.23	82.12	15	7	121.675
74	CdSe-2m10_HIE	0.280276	0.372009	409.52	-820.005	111.965	112.23	82.12	15	7	121.675
75	CdSe-2m10_THR	0.430341	0.372009	409.52	-820.005	111.965	112.23	46.08	5	2	110.364
76	CdSe-2m10_VAL	0.393653	0.372009	409.52	-820.005	111.965	112.23	44.11	5	2	114.354
77	Au100_HID	-3.28332	0.396798	5.139	-908.881	112.705	113.7	82.12	15	7	121.675
78	Au100_HIE	-4.88503	0.396798	5.139	-908.881	112.705	113.7	82.12	15	7	121.675
79	Au100_THR	-0.131831	0.396798	5.139	-908.881	112.705	113.7	46.08	5	2	110.364
80	Au100_VAL	0.179761	0.396798	5.139	-908.881	112.705	113.7	44.11	5	2	114.354
81	Au100_HIP	-0.398688	0.396798	5.139	-908.881	112.705	113.7	83.13	15	7	121.675
82	Au100_CYM	-2.48553	0.396798	5.139	-908.881	112.705	113.7	47.11	2	1	88.6108
83	Au100_DMEP	-9.796	0.396798	5.139	-908.881	112.705	113.7	125.05	22	8	164.987
84	Au100_NC4	-1.72653	0.396798	5.139	-908.881	112.705	113.7	74.17	9	4	174.839
85	Au100_MAS	-1.26045	0.396798	5.139	-908.881	112.705	113.7	74.09	13	5	133.671
86	Au100_MAMM	0.309813	0.396798	5.139	-908.881	112.705	113.7	32.08	2	1	76.6069
87	Au100_GLUP	-0.741552	0.396798	5.139	-908.881	112.705	113.7	74.09	13	5	138.953
88	Au100_ASPP	-0.0719115	0.396798	5.139	-908.881	112.705	113.7	60.06	7	3	112.877
89	Au100_AFUC	-12.0464	0.396798	5.139	-908.881	112.705	113.7	164.18	47	20	284.727
90	Au100_BGLCNA	-8.0146	0.396798	5.139	-908.881	112.705	113.7	221.24	89	34	356.13
91	Au100_BGLC	-4.86677	0.396798	5.139	-908.881	112.705	113.7	180.18	57	24	306.814
92	Ag100_HID	-1.30447	0.322076	3.717	-631.088	113.395	114.705	82.12	15	7	121.675
93	Ag100_HIE	-2.57228	0.322076	3.717	-631.088	113.395	114.705	82.12	15	7	121.675
94	Ag100_THR	0.237502	0.322076	3.717	-631.088	113.395	114.705	46.08	5	2	110.364
95	Ag100_VAL	0.337405	0.322076	3.717	-631.088	113.395	114.705	44.11	5	2	114.354
96	Ag100_CYM	-3.99369	0.322076	3.717	-631.088	113.395	114.705	47.11	2	1	88.6108
97	Ag100_DMEP	-11.2997	0.322076	3.717	-631.088	113.395	114.705	125.05	22	8	164.987
98	Ag100_NC4	-0.635054	0.322076	3.717	-631.088	113.395	114.705	74.17	9	4	174.839
99	Ag100_MAS	-3.15981	0.322076	3.717	-631.088	113.395	114.705	74.09	13	5	133.671
100	Ag100_MAMM	0.107879	0.322076	3.717	-631.088	113.395	114.705	32.08	2	1	76.6069
101	Ag100_GLUP	-1.58227	0.322076	3.717	-631.088	113.395	114.705	74.09	13	5	138.953
102	Ag100_ASPP	0.0875157	0.322076	3.717	-631.088	113.395	114.705	60.06	7	3	112.877
103	Ag100_AFUC	-1.827	0.322076	3.717	-631.088	113.395	114.705	164.18	47	20	284.727
104	Ag100_BGLCNA	-15.8129	0.322076	3.717	-631.088	113.395	114.705	221.24	89	34	356.13
105	Ag100_BGLC	-7.12928	0.322076	3.717	-631.088	113.395	114.705	180.18	57	24	306.814
106	Ag110_HID	-7.58686	0.428996	11.161	-983.401	114.51	115.735	82.12	15	7	121.675
107	Ag110_HIE	-8.23537	0.428996	11.161	-983.401	114.51	115.735	82.12	15	7	121.675
108	Ag110_THR	-2.09161	0.428996	11.161	-983.401	114.51	115.735	46.08	5	2	110.364
109	Ag110_VAL	-3.37962	0.428996	11.161	-983.401	114.51	115.735	44.11	5	2	114.354
110	Ag110_CYM	-7.97092	0.428996	11.161	-983.401	114.51	115.735	47.11	2	1	88.6108
111	Ag110_DMEP	-11.3931	0.428996	11.161	-983.401	114.51	115.735	125.05	22	8	164.987
112	Ag110_NC4	-5.52047	0.428996	11.161	-983.401	114.51	115.735	74.17	9	4	174.839
113	Ag110_MAS	-6.54121	0.428996	11.161	-983.401	114.51	115.735	74.09	13	5	133.671
114	Ag110_MAMM	-2.76463	0.428996	11.161	-983.401	114.51	115.735	32.08	2	1	76.6069
115	Ag110_GLUP	-6.61495	0.428996	11.161	-983.401	114.51	115.735	74.09	13	5	138.953
116	Ag110_ASPP	-4.19756	0.428996	11.161	-983.401	114.51	115.735	60.06	7	3	112.877
117	Ag110_AFUC	-11.4185	0.428996	11.161	-983.401	114.51	115.735	164.18	47	20	284.727
118	Ag110_BGLCNA	-13.5813	0.428996	11.161	-983.401	114.51	115.735	221.24	89	34	356.13
119	Ag110_BGLC	-11.8089	0.428996	11.161	-983.401	114.51	115.735	180.18	57	24	306.814
120	Ag111_HID	-8.35088	0.4	0.0859	-979.059	113.57	114.48	82.12	15	7	121.675
121	Ag111_HIE	-8.38205	0.4	0.0859	-979.059	113.57	114.48	82.12	15	7	121.675
122	Ag111_THR	-1.91712	0.4	0.0859	-979.059	113.57	114.48	46.08	5	2	110.364
123	Ag111_VAL	-1.42076	0.4	0.0859	-979.059	113.57	114.48	44.11	5	2	114.354
124	Ag111_CYM	-5.15696	0.4	0.0859	-979.059	113.57	114.48	47.11	2	1	88.6108
125	Ag111_DMEP	-14.2453	0.4	0.0859	-979.059	113.57	114.48	125.05	22	8	164.987
126	Ag111_NC4	-4.96363	0.4	0.0859	-979.059	113.57	114.48	74.17	9	4	174.839
127	Ag111_MAS	-5.53238	0.4	0.0859	-979.059	113.57	114.48	74.09	13	5	133.671
128	Ag111_MAMM	-0.284622	0.4	0.0859	-979.059	113.57	114.48	32.08	2	1	76.6069
129	Ag111_GLUP	-7.41833	0.4	0.0859	-979.059	113.57	114.48	74.09	13	5	138.953
130	Ag111_ASPP	-5.09262	0.4	0.0859	-979.059	113.57	114.48	60.06	7	3	112.877
131	Ag111_AFUC	-14.0286	0.4	0.0859	-979.059	113.57	114.48	164.18	47	20	284.727
132	Ag111_BGLCNA	-19.7554	0.4	0.0859	-979.059	113.57	114.48	221.24	89	34	356.13
133	Ag111_BGLC	-21.2434	0.4	0.0859	-979.059	113.57	114.48	180.18	57	24	306.814
134	C-amorph_HID	-5.46264	0.806	16.714	-1233.1	111.36	111.84	82.12	15	7	121.675
135	C-amorph_HIE	-5.40335	0.806	16.714	-1233.1	111.36	111.84	82.12	15	7	121.675
136	C-amorph_THR	-1.76471	0.806	16.714	-1233.1	111.36	111.84	46.08	5	2	110.364
137	C-amorph_VAL	-2.69182	0.806	16.714	-1233.1	111.36	111.84	44.11	5	2	114.354
138	C-amorph_HIP	-5.21504	0.806	16.714	-1233.1	111.36	111.84	83.13	15	7	121.675
139	C-amorph_CYM	-0.793038	0.806	16.714	-1233.1	111.36	111.84	47.11	2	1	88.6108
140	C-amorph_DMEP	-4.62311	0.806	16.714	-1233.1	111.36	111.84	125.05	22	8	164.987
141	C-amorph_NC4	-1.46365	0.806	16.714	-1233.1	111.36	111.84	74.17	9	4	174.839
142	C-amorph_MAS	-4.69022	0.806	16.714	-1233.1	111.36	111.84	74.09	13	5	133.671
143	C-amorph_MAMM	-0.0503178	0.806	16.714	-1233.1	111.36	111.84	32.08	2	1	76.6069
144	C-amorph_GLUP	-4.65199	0.806	16.714	-1233.1	111.36	111.84	74.09	13	5	138.953
145	C-amorph_BGLC	-9.99826	0.806	16.714	-1233.1	111.36	111.84	180.18	57	24	306.814
146	CNT-OH-low_HID	-3.45189	1.6	9.2778	-400.57	111.16	111.14	82.12	15	7	121.675
147	CNT-OH-low_HIE	-3.26719	1.6	9.2778	-400.57	111.16	111.14	82.12	15	7	121.675
148	CNT-OH-low_THR	-0.47576	1.6	9.2778	-400.57	111.16	111.14	46.08	5	2	110.364
149	CNT-OH-low_VAL	-0.742569	1.6	9.2778	-400.57	111.16	111.14	44.11	5	2	114.354
150	CNT-OH-low_HIP	-4.1425	1.6	9.2778	-400.57	111.16	111.14	83.13	15	7	121.675
151	CNT-OH-low_CYM	-4.41818	1.6	9.2778	-400.57	111.16	111.14	47.11	2	1	88.6108
152	CNT-OH-low_DMEP	-0.655106	1.6	9.2778	-400.57	111.16	111.14	125.05	22	8	164.987
153	CNT-OH-low_NC4	-0.870666	1.6	9.2778	-400.57	111.16	111.14	74.17	9	4	174.839
154	CNT-OH-low_MAS	-1.71012	1.6	9.2778	-400.57	111.16	111.14	74.09	13	5	133.671
155	CNT-OH-low_MAMM	0.173282	1.6	9.2778	-400.57	111.16	111.14	32.08	2	1	76.6069
156	CNT-OH-low_GLUP	-2.30279	1.6	9.2778	-400.57	111.16	111.14	74.09	13	5	138.953
157	CNT-OH-low_BGLC	-3.62798	1.6	9.2778	-400.57	111.16	111.14	180.18	57	24	306.814
158	CNT-COO(-)-low_HID	-2.73641	1.28	44.816	-923.491	111.525	111.54	82.12	15	7	121.675
159	CNT-COO(-)-low_HIE	-2.35461	1.28	44.816	-923.491	111.525	111.54	82.12	15	7	121.675
160	CNT-COO(-)-low_THR	-0.293153	1.28	44.816	-923.491	111.525	111.54	46.08	5	2	110.364
161	CNT-COO(-)-low_VAL	-0.540104	1.28	44.816	-923.491	111.525	111.54	44.11	5	2	114.354
162	CNT-COO(-)-low_HIP	-5.02949	1.28	44.816	-923.491	111.525	111.54	83.13	15	7	121.675
163	CNT-COO(-)-low_CYM	0.193327	1.28	44.816	-923.491	111.525	111.54	47.11	2	1	88.6108
164	CNT-COO(-)-low_DMEP	-2.19943	1.28	44.816	-923.491	111.525	111.54	125.05	22	8	164.987
165	CNT-COO(-)-low_NC4	-0.0471335	1.28	44.816	-923.491	111.525	111.54	74.17	9	4	174.839
166	CNT-COO(-)-low_MAS	-1.71451	1.28	44.816	-923.491	111.525	111.54	74.09	13	5	133.671
167	CNT-COO(-)-low_MAMM	-0.639519	1.28	44.816	-923.491	111.525	111.54	32.08	2	1	76.6069
168	CNT-COO(-)-low_GLUP	-3.03102	1.28	44.816	-923.491	111.525	111.54	74.09	13	5	138.953
169	CNT-COO(-)-low_BGLC	-9.69448	1.28	44.816	-923.491	111.525	111.54	180.18	57	24	306.814
170	CNT-COO(-)-high_HID	-1.60664	1.96	26.6843	-1699.9	109.513	112.42	82.12	15	7	121.675
171	CNT-COO(-)-high_HIE	-1.75099	1.96	26.6843	-1699.9	109.513	112.42	82.12	15	7	121.675
172	CNT-COO(-)-high_THR	-0.253388	1.96	26.6843	-1699.9	109.513	112.42	46.08	5	2	110.364
173	CNT-COO(-)-high_VAL	0.214425	1.96	26.6843	-1699.9	109.513	112.42	44.11	5	2	114.354
174	CNT-COO(-)-high_HIP	-4.99838	1.96	26.6843	-1699.9	109.513	112.42	83.13	15	7	121.675
175	CNT-COO(-)-high_CYM	-0.186863	1.96	26.6843	-1699.9	109.513	112.42	47.11	2	1	88.6108
176	CNT-COO(-)-high_DMEP	-0.342553	1.96	26.6843	-1699.9	109.513	112.42	125.05	22	8	164.987
177	CNT-COO(-)-high_NC4	-0.0804362	1.96	26.6843	-1699.9	109.513	112.42	74.17	9	4	174.839
178	CNT-COO(-)-high_MAS	-0.854036	1.96	26.6843	-1699.9	109.513	112.42	74.09	13	5	133.671
179	CNT-COO(-)-high_MAMM	-2.54096	1.96	26.6843	-1699.9	109.513	112.42	32.08	2	1	76.6069
180	CNT-COO(-)-high_GLUP	-2.26471	1.96	26.6843	-1699.9	109.513	112.42	74.09	13	5	138.953
181	CNT-COO(-)-high_BGLC	-9.17648	1.96	26.6843	-1699.9	109.513	112.42	180.18	57	24	306.814
182	CNT-15_HID	-3.07023	1.32	13.6565	-463.457	111.935	111.91	82.12	15	7	121.675
183	CNT-15_HIE	-2.97604	1.32	13.6565	-463.457	111.935	111.91	82.12	15	7	121.675
184	CNT-15_THR	-0.505522	1.32	13.6565	-463.457	111.935	111.91	46.08	5	2	110.364
185	CNT-15_VAL	-0.688572	1.32	13.6565	-463.457	111.935	111.91	44.11	5	2	114.354
186	CNT-15_HIP	-3.44965	1.32	13.6565	-463.457	111.935	111.91	83.13	15	7	121.675
187	CNT-15_CYM	0.0498951	1.32	13.6565	-463.457	111.935	111.91	47.11	2	1	88.6108
188	CNT-15_DMEP	-0.994699	1.32	13.6565	-463.457	111.935	111.91	125.05	22	8	164.987
189	CNT-15_NC4	-0.192723	1.32	13.6565	-463.457	111.935	111.91	74.17	9	4	174.839
190	CNT-15_MAS	-2.01537	1.32	13.6565	-463.457	111.935	111.91	74.09	13	5	133.671
191	CNT-15_MAMM	0.233637	1.32	13.6565	-463.457	111.935	111.91	32.08	2	1	76.6069
192	CNT-15_GLUP	-2.5515	1.32	13.6565	-463.457	111.935	111.91	74.09	13	5	138.953
193	CNT-15_BGLC	-3.4276	1.32	13.6565	-463.457	111.935	111.91	180.18	57	24	306.814
194	CNT-NH2-low_HID	-2.47416	1.25222	20.644	-646.53	110.875	110.815	82.12	15	7	121.675
195	CNT-NH2-low_HIE	-3.10838	1.25222	20.644	-646.53	110.875	110.815	82.12	15	7	121.675
196	CNT-NH2-low_THR	-0.553486	1.25222	20.644	-646.53	110.875	110.815	46.08	5	2	110.364
197	CNT-NH2-low_VAL	-0.478897	1.25222	20.644	-646.53	110.875	110.815	44.11	5	2	114.354
198	CNT-NH2-low_HIP	-3.42234	1.25222	20.644	-646.53	110.875	110.815	83.13	15	7	121.675
199	CNT-NH2-low_CYM	0.0371727	1.25222	20.644	-646.53	110.875	110.815	47.11	2	1	88.6108
200	CNT-NH2-low_DMEP	-0.960288	1.25222	20.644	-646.53	110.875	110.815	125.05	22	8	164.987
201	CNT-NH2-low_NC4	-0.469949	1.25222	20.644	-646.53	110.875	110.815	74.17	9	4	174.839
202	CNT-NH2-low_MAS	-2.6247	1.25222	20.644	-646.53	110.875	110.815	74.09	13	5	133.671
203	CNT-NH2-low_MAMM	0.215053	1.25222	20.644	-646.53	110.875	110.815	32.08	2	1	76.6069
204	CNT-NH2-low_GLUP	-2.64471	1.25222	20.644	-646.53	110.875	110.815	74.09	13	5	138.953
205	CNT-NH2-low_BGLC	-3.8487	1.25222	20.644	-646.53	110.875	110.815	180.18	57	24	306.814
206	CNT-NH2-high_HID	-0.461072	1.63817	22.034	-747.235	111.35	111.31	82.12	15	7	121.675
207	CNT-NH2-high_HIE	-0.760065	1.63817	22.034	-747.235	111.35	111.31	82.12	15	7	121.675
208	CNT-NH2-high_THR	0.160901	1.63817	22.034	-747.235	111.35	111.31	46.08	5	2	110.364
209	CNT-NH2-high_VAL	0.589091	1.63817	22.034	-747.235	111.35	111.31	44.11	5	2	114.354
210	CNT-NH2-high_HIP	-0.836544	1.63817	22.034	-747.235	111.35	111.31	83.13	15	7	121.675
211	CNT-NH2-high_CYM	0.265886	1.63817	22.034	-747.235	111.35	111.31	47.11	2	1	88.6108
212	CNT-NH2-high_DMEP	-1.10484	1.63817	22.034	-747.235	111.35	111.31	125.05	22	8	164.987
213	CNT-NH2-high_NC4	-0.694436	1.63817	22.034	-747.235	111.35	111.31	74.17	9	4	174.839
214	CNT-NH2-high_MAS	-0.387212	1.63817	22.034	-747.235	111.35	111.31	74.09	13	5	133.671
215	CNT-NH2-high_MAMM	-1.26298	1.63817	22.034	-747.235	111.35	111.31	32.08	2	1	76.6069
216	CNT-NH2-high_GLUP	-0.978146	1.63817	22.034	-747.235	111.35	111.31	74.09	13	5	138.953
217	CNT-NH2-high_BGLC	-3.74176	1.63817	22.034	-747.235	111.35	111.31	180.18	57	24	306.814
218	CNT-OH-high_HID	-0.921658	1.75	32.6149	-582.197	111.325	111.18	82.12	15	7	121.675
219	CNT-OH-high_HIE	-1.45145	1.75	32.6149	-582.197	111.325	111.18	82.12	15	7	121.675
220	CNT-OH-high_THR	-0.0150545	1.75	32.6149	-582.197	111.325	111.18	46.08	5	2	110.364
221	CNT-OH-high_VAL	0.268246	1.75	32.6149	-582.197	111.325	111.18	44.11	5	2	114.354
222	CNT-OH-high_HIP	-2.27013	1.75	32.6149	-582.197	111.325	111.18	83.13	15	7	121.675
223	CNT-OH-high_CYM	-1.11813	1.75	32.6149	-582.197	111.325	111.18	47.11	2	1	88.6108
224	CNT-OH-high_DMEP	-3.65759	1.75	32.6149	-582.197	111.325	111.18	125.05	22	8	164.987
225	CNT-OH-high_NC4	-2.28151	1.75	32.6149	-582.197	111.325	111.18	74.17	9	4	174.839
226	CNT-OH-high_MAS	-0.074518	1.75	32.6149	-582.197	111.325	111.18	74.09	13	5	133.671
227	CNT-OH-high_MAMM	-0.314736	1.75	32.6149	-582.197	111.325	111.18	32.08	2	1	76.6069
228	CNT-OH-high_GLUP	-0.654038	1.75	32.6149	-582.197	111.325	111.18	74.09	13	5	138.953
229	CNT-OH-high_BGLC	-2.83399	1.75	32.6149	-582.197	111.325	111.18	180.18	57	24	306.814
230	Graphene-oxide_HID	-1.5653	1.35	6.1864	-399.864	111.195	111.395	82.12	15	7	121.675
231	Graphene-oxide_HIE	-1.31678	1.35	6.1864	-399.864	111.195	111.395	82.12	15	7	121.675
232	Graphene-oxide_THR	-0.333267	1.35	6.1864	-399.864	111.195	111.395	46.08	5	2	110.364
233	Graphene-oxide_VAL	-0.075837	1.35	6.1864	-399.864	111.195	111.395	44.11	5	2	114.354
234	Graphene-oxide_HIP	-2.31313	1.35	6.1864	-399.864	111.195	111.395	83.13	15	7	121.675
235	Graphene-oxide_CYM	0.0875728	1.35	6.1864	-399.864	111.195	111.395	47.11	2	1	88.6108
236	Graphene-oxide_DMEP	-0.969427	1.35	6.1864	-399.864	111.195	111.395	125.05	22	8	164.987
237	Graphene-oxide_NC4	-1.96404	1.35	6.1864	-399.864	111.195	111.395	74.17	9	4	174.839
238	Graphene-oxide_MAS	-0.838213	1.35	6.1864	-399.864	111.195	111.395	74.09	13	5	133.671
239	Graphene-oxide_MAMM	-0.826942	1.35	6.1864	-399.864	111.195	111.395	32.08	2	1	76.6069
240	Graphene-oxide_GLUP	-1.29835	1.35	6.1864	-399.864	111.195	111.395	74.09	13	5	138.953
241	Graphene-oxide_BGLC	-3.71146	1.35	6.1864	-399.864	111.195	111.395	180.18	57	24	306.814
242	Reduced-graphene-oxide_HID	-5.7371	1.73849	2.471	-330.059	111.01	111.205	82.12	15	7	121.675
243	Reduced-graphene-oxide_HIE	-5.57639	1.73849	2.471	-330.059	111.01	111.205	82.12	15	7	121.675
244	Reduced-graphene-oxide_THR	-2.06909	1.73849	2.471	-330.059	111.01	111.205	46.08	5	2	110.364
245	Reduced-graphene-oxide_VAL	-3.06833	1.73849	2.471	-330.059	111.01	111.205	44.11	5	2	114.354
246	Reduced-graphene-oxide_HIP	-5.43884	1.73849	2.471	-330.059	111.01	111.205	83.13	15	7	121.675
247	Reduced-graphene-oxide_CYM	-0.336668	1.73849	2.471	-330.059	111.01	111.205	47.11	2	1	88.6108
248	Reduced-graphene-oxide_DMEP	-2.73808	1.73849	2.471	-330.059	111.01	111.205	125.05	22	8	164.987
249	Reduced-graphene-oxide_NC4	-0.643279	1.73849	2.471	-330.059	111.01	111.205	74.17	9	4	174.839
250	Reduced-graphene-oxide_MAS	-5.15251	1.73849	2.471	-330.059	111.01	111.205	74.09	13	5	133.671
251	Reduced-graphene-oxide_MAMM	0.0394441	1.73849	2.471	-330.059	111.01	111.205	32.08	2	1	76.6069
252	Reduced-graphene-oxide_GLUP	-4.28282	1.73849	2.471	-330.059	111.01	111.205	74.09	13	5	138.953
253	Reduced-graphene-oxide_BGLC	-6.64641	1.73849	2.471	-330.059	111.01	111.205	180.18	57	24	306.814
254	Graphene_HID	-5.17734	1.17	0.013	-481.646	112.05	112.71	82.12	15	7	121.675
255	Graphene_HIE	-5.30118	1.17	0.013	-481.646	112.05	112.71	82.12	15	7	121.675
256	Graphene_THR	-1.46134	1.17	0.013	-481.646	112.05	112.71	46.08	5	2	110.364
257	Graphene_VAL	-1.8939	1.17	0.013	-481.646	112.05	112.71	44.11	5	2	114.354
258	Graphene_HIP	-5.44152	1.17	0.013	-481.646	112.05	112.71	83.13	15	7	121.675
259	Graphene_CYM	-0.344337	1.17	0.013	-481.646	112.05	112.71	47.11	2	1	88.6108
260	Graphene_DMEP	-1.88277	1.17	0.013	-481.646	112.05	112.71	125.05	22	8	164.987
261	Graphene_NC4	-0.582334	1.17	0.013	-481.646	112.05	112.71	74.17	9	4	174.839
262	Graphene_MAS	-4.18932	1.17	0.013	-481.646	112.05	112.71	74.09	13	5	133.671
263	Graphene_MAMM	0.0692233	1.17	0.013	-481.646	112.05	112.71	32.08	2	1	76.6069
264	Graphene_GLUP	-4.10421	1.17	0.013	-481.646	112.05	112.71	74.09	13	5	138.953
265	Graphene_BGLC	-6.1421	1.17	0.013	-481.646	112.05	112.71	180.18	57	24	306.814
266	CNT-COOH-high_HID	-0.429898	2.5	33.699	-630.086	111.175	110.975	82.12	15	7	121.675
267	CNT-COOH-high_HIE	-1.16673	2.5	33.699	-630.086	111.175	110.975	82.12	15	7	121.675
268	CNT-COOH-high_THR	0.11462	2.5	33.699	-630.086	111.175	110.975	46.08	5	2	110.364
269	CNT-COOH-high_VAL	0.104806	2.5	33.699	-630.086	111.175	110.975	44.11	5	2	114.354
270	CNT-COOH-high_HIP	-0.493385	2.5	33.699	-630.086	111.175	110.975	83.13	15	7	121.675
271	CNT-COOH-high_CYM	-2.87855	2.5	33.699	-630.086	111.175	110.975	47.11	2	1	88.6108
272	CNT-COOH-high_DMEP	-5.68227	2.5	33.699	-630.086	111.175	110.975	125.05	22	8	164.987
273	CNT-COOH-high_NC4	-0.293484	2.5	33.699	-630.086	111.175	110.975	74.17	9	4	174.839
274	CNT-COOH-high_MAS	-0.20236	2.5	33.699	-630.086	111.175	110.975	74.09	13	5	133.671
275	CNT-COOH-high_MAMM	0.0918335	2.5	33.699	-630.086	111.175	110.975	32.08	2	1	76.6069
276	CNT-COOH-high_GLUP	-1.61453	2.5	33.699	-630.086	111.175	110.975	74.09	13	5	138.953
277	CNT-COOH-high_BGLC	-0.875278	2.5	33.699	-630.086	111.175	110.975	180.18	57	24	306.814
278	CNT-COOH-low_HID	-3.10071	1.25	10.999	-711.254	111.07	110.915	82.12	15	7	121.675
279	CNT-COOH-low_HIE	-3.20198	1.25	10.999	-711.254	111.07	110.915	82.12	15	7	121.675
280	CNT-COOH-low_THR	-0.728578	1.25	10.999	-711.254	111.07	110.915	46.08	5	2	110.364
281	CNT-COOH-low_VAL	-0.554421	1.25	10.999	-711.254	111.07	110.915	44.11	5	2	114.354
282	CNT-COOH-low_HIP	-2.86743	1.25	10.999	-711.254	111.07	110.915	83.13	15	7	121.675
283	CNT-COOH-low_CYM	0.0627426	1.25	10.999	-711.254	111.07	110.915	47.11	2	1	88.6108
284	CNT-COOH-low_DMEP	-0.872832	1.25	10.999	-711.254	111.07	110.915	125.05	22	8	164.987
285	CNT-COOH-low_NC4	-0.214299	1.25	10.999	-711.254	111.07	110.915	74.17	9	4	174.839
286	CNT-COOH-low_MAS	-2.83048	1.25	10.999	-711.254	111.07	110.915	74.09	13	5	133.671
287	CNT-COOH-low_MAMM	0.243315	1.25	10.999	-711.254	111.07	110.915	32.08	2	1	76.6069
288	CNT-COOH-low_GLUP	-2.02051	1.25	10.999	-711.254	111.07	110.915	74.09	13	5	138.953
289	CNT-COOH-low_BGLC	-3.48563	1.25	10.999	-711.254	111.07	110.915	180.18	57	24	306.814
290	CNT-NH3(+)-low_HID	-2.24909	1.34368	34.803	-739.64	111.345	111.21	82.12	15	7	121.675
291	CNT-NH3(+)-low_HIE	-3.04994	1.34368	34.803	-739.64	111.345	111.21	82.12	15	7	121.675
292	CNT-NH3(+)-low_THR	-0.301571	1.34368	34.803	-739.64	111.345	111.21	46.08	5	2	110.364
293	CNT-NH3(+)-low_VAL	-0.545446	1.34368	34.803	-739.64	111.345	111.21	44.11	5	2	114.354
294	CNT-NH3(+)-low_HIP	-1.86003	1.34368	34.803	-739.64	111.345	111.21	83.13	15	7	121.675
295	CNT-NH3(+)-low_CYM	-6.57495	1.34368	34.803	-739.64	111.345	111.21	47.11	2	1	88.6108
296	CNT-NH3(+)-low_DMEP	-12.9846	1.34368	34.803	-739.64	111.345	111.21	125.05	22	8	164.987
297	CNT-NH3(+)-low_NC4	0.293112	1.34368	34.803	-739.64	111.345	111.21	74.17	9	4	174.839
298	CNT-NH3(+)-low_MAS	-2.91305	1.34368	34.803	-739.64	111.345	111.21	74.09	13	5	133.671
299	CNT-NH3(+)-low_MAMM	0.432025	1.34368	34.803	-739.64	111.345	111.21	32.08	2	1	76.6069
300	CNT-NH3(+)-low_GLUP	-2.31403	1.34368	34.803	-739.64	111.345	111.21	74.09	13	5	138.953
301	CNT-NH3(+)-low_BGLC	-4.21176	1.34368	34.803	-739.64	111.345	111.21	180.18	57	24	306.814
302	CNT-NH3(+)-high_HID	-2.77043	1.52911	44.075	-371.26	111.305	111.605	82.12	15	7	121.675
303	CNT-NH3(+)-high_HIE	-2.2717	1.52911	44.075	-371.26	111.305	111.605	82.12	15	7	121.675
304	CNT-NH3(+)-high_THR	-0.317084	1.52911	44.075	-371.26	111.305	111.605	46.08	5	2	110.364
305	CNT-NH3(+)-high_VAL	-0.0603749	1.52911	44.075	-371.26	111.305	111.605	44.11	5	2	114.354
306	CNT-NH3(+)-high_HIP	-1.05539	1.52911	44.075	-371.26	111.305	111.605	83.13	15	7	121.675
307	CNT-NH3(+)-high_CYM	-5.74397	1.52911	44.075	-371.26	111.305	111.605	47.11	2	1	88.6108
308	CNT-NH3(+)-high_DMEP	-10.3125	1.52911	44.075	-371.26	111.305	111.605	125.05	22	8	164.987
309	CNT-NH3(+)-high_NC4	0.662723	1.52911	44.075	-371.26	111.305	111.605	74.17	9	4	174.839
310	CNT-NH3(+)-high_MAS	-1.76165	1.52911	44.075	-371.26	111.305	111.605	74.09	13	5	133.671
311	CNT-NH3(+)-high_MAMM	0.657165	1.52911	44.075	-371.26	111.305	111.605	32.08	2	1	76.6069
312	CNT-NH3(+)-high_GLUP	-1.8654	1.52911	44.075	-371.26	111.305	111.605	74.09	13	5	138.953
313	CNT-NH3(+)-high_BGLC	-2.78376	1.52911	44.075	-371.26	111.305	111.605	180.18	57	24	306.814
314	Anatase-OH-100_HID	0.290627	1.544	57.8982	-523.966	110.735	111.51	82.12	15	7	121.675
315	Anatase-OH-100_HIE	0.274438	1.544	57.8982	-523.966	110.735	111.51	82.12	15	7	121.675
316	Anatase-OH-100_THR	0.402931	1.544	57.8982	-523.966	110.735	111.51	46.08	5	2	110.364
317	Anatase-OH-100_VAL	0.525939	1.544	57.8982	-523.966	110.735	111.51	44.11	5	2	114.354
318	Anatase-OH-100_HIP	-0.164952	1.544	57.8982	-523.966	110.735	111.51	83.13	15	7	121.675
319	Anatase-OH-100_CYM	-3.5384	1.544	57.8982	-523.966	110.735	111.51	47.11	2	1	88.6108
320	Anatase-OH-100_DMEP	-0.155166	1.544	57.8982	-523.966	110.735	111.51	125.05	22	8	164.987
321	Anatase-OH-100_NC4	0.185499	1.544	57.8982	-523.966	110.735	111.51	74.17	9	4	174.839
322	Anatase-OH-100_MAS	0.442235	1.544	57.8982	-523.966	110.735	111.51	74.09	13	5	133.671
323	Anatase-OH-100_MAMM	-0.184529	1.544	57.8982	-523.966	110.735	111.51	32.08	2	1	76.6069
324	Anatase-OH-100_GLUP	0.315927	1.544	57.8982	-523.966	110.735	111.51	74.09	13	5	138.953
325	Anatase-OH-100_BGLC	-0.404941	1.544	57.8982	-523.966	110.735	111.51	180.18	57	24	306.814

## Sheet: EVS-WithoutOutliers
ID	NM_AA/Biomolecule pair	Adsorption Energy [kT, T=298K]	Σ Pauling electronegativity / Å^2	Dipole moment (Debye)	Quadrupole moment (1/3 of trace of diagonalized matrix Q) (Debye×Å)	FDV_mean(kcal/mol)	FDH_mean(kcal/mol)	MW	ECC	UNIP	SAtot
1	SiO2-quartz_HID	-1.43358	1.13	68.177	-524.101	107.415	108.34	82.12	15	7	121.675
2	SiO2-quartz_HIE	-1.39701	1.13	68.177	-524.101	107.415	108.34	82.12	15	7	121.675
3	SiO2-quartz_THR	-0.713946	1.13	68.177	-524.101	107.415	108.34	46.08	5	2	110.364
4	SiO2-quartz_VAL	-1.17726	1.13	68.177	-524.101	107.415	108.34	44.11	5	2	114.354
5	SiO2-quartz_HIP	-0.736486	1.13	68.177	-524.101	107.415	108.34	83.13	15	7	121.675
6	SiO2-quartz_CYM	-0.0147862	1.13	68.177	-524.101	107.415	108.34	47.11	2	1	88.6108
7	SiO2-quartz_DMEP	-0.252139	1.13	68.177	-524.101	107.415	108.34	125.05	22	8	164.987
8	SiO2-quartz_NC4	0.0499347	1.13	68.177	-524.101	107.415	108.34	74.17	9	4	174.839
9	SiO2-quartz_MAS	-1.45157	1.13	68.177	-524.101	107.415	108.34	74.09	13	5	133.671
10	SiO2-quartz_MAMM	0.209787	1.13	68.177	-524.101	107.415	108.34	32.08	2	1	76.6069
11	SiO2-quartz_GLUP	-1.16021	1.13	68.177	-524.101	107.415	108.34	74.09	13	5	138.953
12	SiO2-quartz_BGLC	-1.56686	1.13	68.177	-524.101	107.415	108.34	180.18	57	24	306.814
13	SiO2-amorph_HID	-1.19513	1.1	68.6398	-628.887	111.245	111.425	82.12	15	7	121.675
14	SiO2-amorph_HIE	-1.05303	1.1	68.6398	-628.887	111.245	111.425	82.12	15	7	121.675
15	SiO2-amorph_THR	-0.504797	1.1	68.6398	-628.887	111.245	111.425	46.08	5	2	110.364
16	SiO2-amorph_VAL	-0.767243	1.1	68.6398	-628.887	111.245	111.425	44.11	5	2	114.354
17	SiO2-amorph_HIP	-0.889263	1.1	68.6398	-628.887	111.245	111.425	83.13	15	7	121.675
18	SiO2-amorph_CYM	0.0914824	1.1	68.6398	-628.887	111.245	111.425	47.11	2	1	88.6108
19	SiO2-amorph_DMEP	-0.365143	1.1	68.6398	-628.887	111.245	111.425	125.05	22	8	164.987
20	SiO2-amorph_NC4	-0.233345	1.1	68.6398	-628.887	111.245	111.425	74.17	9	4	174.839
21	SiO2-amorph_MAS	-1.16255	1.1	68.6398	-628.887	111.245	111.425	74.09	13	5	133.671
22	SiO2-amorph_MAMM	0.236749	1.1	68.6398	-628.887	111.245	111.425	32.08	2	1	76.6069
23	SiO2-amorph_GLUP	-0.893479	1.1	68.6398	-628.887	111.245	111.425	74.09	13	5	138.953
24	SiO2-amorph_BGLC	-1.74771	1.1	68.6398	-628.887	111.245	111.425	180.18	57	24	306.814
25	Anatase-OH-101_HID	0.37125	0.973	116.15	-169.658	108.55	100.565	82.12	15	7	121.675
26	Anatase-OH-101_HIE	0.417544	0.973	116.15	-169.658	108.55	100.565	82.12	15	7	121.675
27	Anatase-OH-101_THR	0.485557	0.973	116.15	-169.658	108.55	100.565	46.08	5	2	110.364
28	Anatase-OH-101_VAL	0.639821	0.973	116.15	-169.658	108.55	100.565	44.11	5	2	114.354
29	Anatase-OH-101_HIP	0.0544796	0.973	116.15	-169.658	108.55	100.565	83.13	15	7	121.675
30	Anatase-OH-101_CYM	-2.88052	0.973	116.15	-169.658	108.55	100.565	47.11	2	1	88.6108
31	Anatase-OH-101_DMEP	9.38408e-05	0.973	116.15	-169.658	108.55	100.565	125.05	22	8	164.987
32	Anatase-OH-101_NC4	0.481362	0.973	116.15	-169.658	108.55	100.565	74.17	9	4	174.839
33	Anatase-OH-101_MAS	0.559965	0.973	116.15	-169.658	108.55	100.565	74.09	13	5	133.671
34	Anatase-OH-101_MAMM	-0.682553	0.973	116.15	-169.658	108.55	100.565	32.08	2	1	76.6069
35	Anatase-OH-101_GLUP	0.335359	0.973	116.15	-169.658	108.55	100.565	74.09	13	5	138.953
36	Anatase-OH-101_BGLC	-0.758491	0.973	116.15	-169.658	108.55	100.565	180.18	57	24	306.814
37	Rutile-OH-110_HID	0.336829	1.1327	33.5855	-763.76	111.34	110.78	82.12	15	7	121.675
38	Rutile-OH-110_HIE	0.358492	1.1327	33.5855	-763.76	111.34	110.78	82.12	15	7	121.675
39	Rutile-OH-110_THR	0.281117	1.1327	33.5855	-763.76	111.34	110.78	46.08	5	2	110.364
40	Rutile-OH-110_VAL	0.469944	1.1327	33.5855	-763.76	111.34	110.78	44.11	5	2	114.354
41	Rutile-OH-110_HIP	-0.757941	1.1327	33.5855	-763.76	111.34	110.78	83.13	15	7	121.675
42	Rutile-OH-110_CYM	0.316506	1.1327	33.5855	-763.76	111.34	110.78	47.11	2	1	88.6108
43	Rutile-OH-110_DMEP	-0.200288	1.1327	33.5855	-763.76	111.34	110.78	125.05	22	8	164.987
44	Rutile-OH-110_NC4	-0.30759	1.1327	33.5855	-763.76	111.34	110.78	74.17	9	4	174.839
45	Rutile-OH-110_MAS	0.378988	1.1327	33.5855	-763.76	111.34	110.78	74.09	13	5	133.671
46	Rutile-OH-110_MAMM	-0.943146	1.1327	33.5855	-763.76	111.34	110.78	32.08	2	1	76.6069
47	Rutile-OH-110_GLUP	0.175429	1.1327	33.5855	-763.76	111.34	110.78	74.09	13	5	138.953
48	Rutile-OH-110_BGLC	-1.68199	1.1327	33.5855	-763.76	111.34	110.78	180.18	57	24	306.814
49	Rutile-OH-100_HID	0.291501	1.665	244.018	-629.412	107.69	112.67	82.12	15	7	121.675
50	Rutile-OH-100_HIE	0.261009	1.665	244.018	-629.412	107.69	112.67	82.12	15	7	121.675
51	Rutile-OH-100_THR	0.416504	1.665	244.018	-629.412	107.69	112.67	46.08	5	2	110.364
52	Rutile-OH-100_VAL	0.576193	1.665	244.018	-629.412	107.69	112.67	44.11	5	2	114.354
53	Rutile-OH-100_HIP	-0.6761	1.665	244.018	-629.412	107.69	112.67	83.13	15	7	121.675
54	Rutile-OH-100_CYM	-0.235376	1.665	244.018	-629.412	107.69	112.67	47.11	2	1	88.6108
55	Rutile-OH-100_DMEP	-0.229211	1.665	244.018	-629.412	107.69	112.67	125.05	22	8	164.987
56	Rutile-OH-100_NC4	-0.0634065	1.665	244.018	-629.412	107.69	112.67	74.17	9	4	174.839
57	Rutile-OH-100_MAS	0.45617	1.665	244.018	-629.412	107.69	112.67	74.09	13	5	133.671
58	Rutile-OH-100_MAMM	-0.987865	1.665	244.018	-629.412	107.69	112.67	32.08	2	1	76.6069
59	Rutile-OH-100_GLUP	0.264348	1.665	244.018	-629.412	107.69	112.67	74.09	13	5	138.953
60	Rutile-OH-100_BGLC	-1.04891	1.665	244.018	-629.412	107.69	112.67	180.18	57	24	306.814
61	Fe2O3_HID	0.104679	0.92	355.106	-1124.46	112.155	112.785	82.12	15	7	121.675
62	Fe2O3_HIE	0.209569	0.92	355.106	-1124.46	112.155	112.785	82.12	15	7	121.675
63	Fe2O3_THR	0.287664	0.92	355.106	-1124.46	112.155	112.785	46.08	5	2	110.364
64	Fe2O3_VAL	0.312438	0.92	355.106	-1124.46	112.155	112.785	44.11	5	2	114.354
65	Fe2O3_HIP	0.337858	0.92	355.106	-1124.46	112.155	112.785	83.13	15	7	121.675
66	Fe2O3_CYM	-0.195048	0.92	355.106	-1124.46	112.155	112.785	47.11	2	1	88.6108
67	Fe2O3_DMEP	-0.0200389	0.92	355.106	-1124.46	112.155	112.785	125.05	22	8	164.987
68	Fe2O3_NC4	0.395367	0.92	355.106	-1124.46	112.155	112.785	74.17	9	4	174.839
69	Fe2O3_MAS	0.271486	0.92	355.106	-1124.46	112.155	112.785	74.09	13	5	133.671
70	Fe2O3_MAMM	0.414951	0.92	355.106	-1124.46	112.155	112.785	32.08	2	1	76.6069
71	Fe2O3_GLUP	0.121298	0.92	355.106	-1124.46	112.155	112.785	74.09	13	5	138.953
72	Fe2O3_BGLC	-0.669523	0.92	355.106	-1124.46	112.155	112.785	180.18	57	24	306.814
73	CdSe-2m10_HID	0.48369	0.372009	409.52	-820.005	111.965	112.23	82.12	15	7	121.675
74	CdSe-2m10_HIE	0.280276	0.372009	409.52	-820.005	111.965	112.23	82.12	15	7	121.675
75	CdSe-2m10_THR	0.430341	0.372009	409.52	-820.005	111.965	112.23	46.08	5	2	110.364
76	CdSe-2m10_VAL	0.393653	0.372009	409.52	-820.005	111.965	112.23	44.11	5	2	114.354
77	Au100_HIE	-4.88503	0.396798	5.139	-908.881	112.705	113.7	82.12	15	7	121.675
78	Au100_CYM	-2.48553	0.396798	5.139	-908.881	112.705	113.7	47.11	2	1	88.6108
79	Au100_DMEP	-9.796	0.396798	5.139	-908.881	112.705	113.7	125.05	22	8	164.987
80	Au100_AFUC	-12.0464	0.396798	5.139	-908.881	112.705	113.7	164.18	47	20	284.727
81	Ag100_HID	-1.30447	0.322076	3.717	-631.088	113.395	114.705	82.12	15	7	121.675
82	Ag100_HIE	-2.57228	0.322076	3.717	-631.088	113.395	114.705	82.12	15	7	121.675
83	Ag100_THR	0.237502	0.322076	3.717	-631.088	113.395	114.705	46.08	5	2	110.364
84	Ag100_VAL	0.337405	0.322076	3.717	-631.088	113.395	114.705	44.11	5	2	114.354
85	Ag100_CYM	-3.99369	0.322076	3.717	-631.088	113.395	114.705	47.11	2	1	88.6108
86	Ag100_NC4	-0.635054	0.322076	3.717	-631.088	113.395	114.705	74.17	9	4	174.839
87	Ag100_MAS	-3.15981	0.322076	3.717	-631.088	113.395	114.705	74.09	13	5	133.671
88	Ag100_MAMM	0.107879	0.322076	3.717	-631.088	113.395	114.705	32.08	2	1	76.6069
89	Ag100_GLUP	-1.58227	0.322076	3.717	-631.088	113.395	114.705	74.09	13	5	138.953
90	Ag100_ASPP	0.0875157	0.322076	3.717	-631.088	113.395	114.705	60.06	7	3	112.877
91	Ag100_BGLC	-7.12928	0.322076	3.717	-631.088	113.395	114.705	180.18	57	24	306.814
92	Ag110_HID	-7.58686	0.428996	11.161	-983.401	114.51	115.735	82.12	15	7	121.675
93	Ag110_HIE	-8.23537	0.428996	11.161	-983.401	114.51	115.735	82.12	15	7	121.675
94	Ag110_THR	-2.09161	0.428996	11.161	-983.401	114.51	115.735	46.08	5	2	110.364
95	Ag110_VAL	-3.37962	0.428996	11.161	-983.401	114.51	115.735	44.11	5	2	114.354
96	Ag110_DMEP	-11.3931	0.428996	11.161	-983.401	114.51	115.735	125.05	22	8	164.987
97	Ag110_NC4	-5.52047	0.428996	11.161	-983.401	114.51	115.735	74.17	9	4	174.839
98	Ag110_MAS	-6.54121	0.428996	11.161	-983.401	114.51	115.735	74.09	13	5	133.671
99	Ag110_MAMM	-2.76463	0.428996	11.161	-983.401	114.51	115.735	32.08	2	1	76.6069
100	Ag110_GLUP	-6.61495	0.428996	11.161	-983.401	114.51	115.735	74.09	13	5	138.953
101	Ag110_ASPP	-4.19756	0.428996	11.161	-983.401	114.51	115.735	60.06	7	3	112.877
102	Ag110_AFUC	-11.4185	0.428996	11.161	-983.401	114.51	115.735	164.18	47	20	284.727
103	Ag110_BGLCNA	-13.5813	0.428996	11.161	-983.401	114.51	115.735	221.24	89	34	356.13
104	Ag110_BGLC	-11.8089	0.428996	11.161	-983.401	114.51	115.735	180.18	57	24	306.814
105	Ag111_HID	-8.35088	0.4	0.0859	-979.059	113.57	114.48	82.12	15	7	121.675
106	Ag111_HIE	-8.38205	0.4	0.0859	-979.059	113.57	114.48	82.12	15	7	121.675
107	Ag111_THR	-1.91712	0.4	0.0859	-979.059	113.57	114.48	46.08	5	2	110.364
108	Ag111_VAL	-1.42076	0.4	0.0859	-979.059	113.57	114.48	44.11	5	2	114.354
109	Ag111_CYM	-5.15696	0.4	0.0859	-979.059	113.57	114.48	47.11	2	1	88.6108
110	Ag111_DMEP	-14.2453	0.4	0.0859	-979.059	113.57	114.48	125.05	22	8	164.987
111	Ag111_NC4	-4.96363	0.4	0.0859	-979.059	113.57	114.48	74.17	9	4	174.839
112	Ag111_MAS	-5.53238	0.4	0.0859	-979.059	113.57	114.48	74.09	13	5	133.671
113	Ag111_MAMM	-0.284622	0.4	0.0859	-979.059	113.57	114.48	32.08	2	1	76.6069
114	Ag111_GLUP	-7.41833	0.4	0.0859	-979.059	113.57	114.48	74.09	13	5	138.953
115	Ag111_ASPP	-5.09262	0.4	0.0859	-979.059	113.57	114.48	60.06	7	3	112.877
116	Ag111_AFUC	-14.0286	0.4	0.0859	-979.059	113.57	114.48	164.18	47	20	284.727
117	C-amorph_HID	-5.46264	0.806	16.714	-1233.1	111.36	111.84	82.12	15	7	121.675
118	C-amorph_HIE	-5.40335	0.806	16.714	-1233.1	111.36	111.84	82.12	15	7	121.675
119	C-amorph_THR	-1.76471	0.806	16.714	-1233.1	111.36	111.84	46.08	5	2	110.364
120	C-amorph_VAL	-2.69182	0.806	16.714	-1233.1	111.36	111.84	44.11	5	2	114.354
121	C-amorph_HIP	-5.21504	0.806	16.714	-1233.1	111.36	111.84	83.13	15	7	121.675
122	C-amorph_CYM	-0.793038	0.806	16.714	-1233.1	111.36	111.84	47.11	2	1	88.6108
123	C-amorph_DMEP	-4.62311	0.806	16.714	-1233.1	111.36	111.84	125.05	22	8	164.987
124	C-amorph_NC4	-1.46365	0.806	16.714	-1233.1	111.36	111.84	74.17	9	4	174.839
125	C-amorph_MAS	-4.69022	0.806	16.714	-1233.1	111.36	111.84	74.09	13	5	133.671
126	C-amorph_MAMM	-0.0503178	0.806	16.714	-1233.1	111.36	111.84	32.08	2	1	76.6069
127	C-amorph_GLUP	-4.65199	0.806	16.714	-1233.1	111.36	111.84	74.09	13	5	138.953
128	CNT-OH-low_HID	-3.45189	1.6	9.2778	-400.57	111.16	111.14	82.12	15	7	121.675
129	CNT-OH-low_HIE	-3.26719	1.6	9.2778	-400.57	111.16	111.14	82.12	15	7	121.675
130	CNT-OH-low_THR	-0.47576	1.6	9.2778	-400.57	111.16	111.14	46.08	5	2	110.364
131	CNT-OH-low_VAL	-0.742569	1.6	9.2778	-400.57	111.16	111.14	44.11	5	2	114.354
132	CNT-OH-low_HIP	-4.1425	1.6	9.2778	-400.57	111.16	111.14	83.13	15	7	121.675
133	CNT-OH-low_CYM	-4.41818	1.6	9.2778	-400.57	111.16	111.14	47.11	2	1	88.6108
134	CNT-OH-low_DMEP	-0.655106	1.6	9.2778	-400.57	111.16	111.14	125.05	22	8	164.987
135	CNT-OH-low_NC4	-0.870666	1.6	9.2778	-400.57	111.16	111.14	74.17	9	4	174.839
136	CNT-OH-low_MAS	-1.71012	1.6	9.2778	-400.57	111.16	111.14	74.09	13	5	133.671
137	CNT-OH-low_MAMM	0.173282	1.6	9.2778	-400.57	111.16	111.14	32.08	2	1	76.6069
138	CNT-OH-low_GLUP	-2.30279	1.6	9.2778	-400.57	111.16	111.14	74.09	13	5	138.953
139	CNT-OH-low_BGLC	-3.62798	1.6	9.2778	-400.57	111.16	111.14	180.18	57	24	306.814
140	CNT-COO(-)-low_HID	-2.73641	1.28	44.816	-923.491	111.525	111.54	82.12	15	7	121.675
141	CNT-COO(-)-low_HIE	-2.35461	1.28	44.816	-923.491	111.525	111.54	82.12	15	7	121.675
142	CNT-COO(-)-low_THR	-0.293153	1.28	44.816	-923.491	111.525	111.54	46.08	5	2	110.364
143	CNT-COO(-)-low_VAL	-0.540104	1.28	44.816	-923.491	111.525	111.54	44.11	5	2	114.354
144	CNT-COO(-)-low_HIP	-5.02949	1.28	44.816	-923.491	111.525	111.54	83.13	15	7	121.675
145	CNT-COO(-)-low_CYM	0.193327	1.28	44.816	-923.491	111.525	111.54	47.11	2	1	88.6108
146	CNT-COO(-)-low_DMEP	-2.19943	1.28	44.816	-923.491	111.525	111.54	125.05	22	8	164.987
147	CNT-COO(-)-low_NC4	-0.0471335	1.28	44.816	-923.491	111.525	111.54	74.17	9	4	174.839
148	CNT-COO(-)-low_MAS	-1.71451	1.28	44.816	-923.491	111.525	111.54	74.09	13	5	133.671
149	CNT-COO(-)-low_MAMM	-0.639519	1.28	44.816	-923.491	111.525	111.54	32.08	2	1	76.6069
150	CNT-COO(-)-low_GLUP	-3.03102	1.28	44.816	-923.491	111.525	111.54	74.09	13	5	138.953
151	CNT-COO(-)-high_HID	-1.60664	1.96	26.6843	-1699.9	109.513	112.42	82.12	15	7	121.675
152	CNT-COO(-)-high_HIE	-1.75099	1.96	26.6843	-1699.9	109.513	112.42	82.12	15	7	121.675
153	CNT-COO(-)-high_THR	-0.253388	1.96	26.6843	-1699.9	109.513	112.42	46.08	5	2	110.364
154	CNT-COO(-)-high_VAL	0.214425	1.96	26.6843	-1699.9	109.513	112.42	44.11	5	2	114.354
155	CNT-COO(-)-high_HIP	-4.99838	1.96	26.6843	-1699.9	109.513	112.42	83.13	15	7	121.675
156	CNT-COO(-)-high_CYM	-0.186863	1.96	26.6843	-1699.9	109.513	112.42	47.11	2	1	88.6108
157	CNT-COO(-)-high_DMEP	-0.342553	1.96	26.6843	-1699.9	109.513	112.42	125.05	22	8	164.987
158	CNT-COO(-)-high_NC4	-0.0804362	1.96	26.6843	-1699.9	109.513	112.42	74.17	9	4	174.839
159	CNT-COO(-)-high_MAS	-0.854036	1.96	26.6843	-1699.9	109.513	112.42	74.09	13	5	133.671
160	CNT-COO(-)-high_MAMM	-2.54096	1.96	26.6843	-1699.9	109.513	112.42	32.08	2	1	76.6069
161	CNT-COO(-)-high_GLUP	-2.26471	1.96	26.6843	-1699.9	109.513	112.42	74.09	13	5	138.953
162	CNT-15_HID	-3.07023	1.32	13.6565	-463.457	111.935	111.91	82.12	15	7	121.675
163	CNT-15_HIE	-2.97604	1.32	13.6565	-463.457	111.935	111.91	82.12	15	7	121.675
164	CNT-15_THR	-0.505522	1.32	13.6565	-463.457	111.935	111.91	46.08	5	2	110.364
165	CNT-15_VAL	-0.688572	1.32	13.6565	-463.457	111.935	111.91	44.11	5	2	114.354
166	CNT-15_HIP	-3.44965	1.32	13.6565	-463.457	111.935	111.91	83.13	15	7	121.675
167	CNT-15_CYM	0.0498951	1.32	13.6565	-463.457	111.935	111.91	47.11	2	1	88.6108
168	CNT-15_DMEP	-0.994699	1.32	13.6565	-463.457	111.935	111.91	125.05	22	8	164.987
169	CNT-15_NC4	-0.192723	1.32	13.6565	-463.457	111.935	111.91	74.17	9	4	174.839
170	CNT-15_MAS	-2.01537	1.32	13.6565	-463.457	111.935	111.91	74.09	13	5	133.671
171	CNT-15_MAMM	0.233637	1.32	13.6565	-463.457	111.935	111.91	32.08	2	1	76.6069
172	CNT-15_GLUP	-2.5515	1.32	13.6565	-463.457	111.935	111.91	74.09	13	5	138.953
173	CNT-15_BGLC	-3.4276	1.32	13.6565	-463.457	111.935	111.91	180.18	57	24	306.814
174	CNT-NH2-low_HID	-2.47416	1.25222	20.644	-646.53	110.875	110.815	82.12	15	7	121.675
175	CNT-NH2-low_HIE	-3.10838	1.25222	20.644	-646.53	110.875	110.815	82.12	15	7	121.675
176	CNT-NH2-low_THR	-0.553486	1.25222	20.644	-646.53	110.875	110.815	46.08	5	2	110.364
177	CNT-NH2-low_VAL	-0.478897	1.25222	20.644	-646.53	110.875	110.815	44.11	5	2	114.354
178	CNT-NH2-low_HIP	-3.42234	1.25222	20.644	-646.53	110.875	110.815	83.13	15	7	121.675
179	CNT-NH2-low_CYM	0.0371727	1.25222	20.644	-646.53	110.875	110.815	47.11	2	1	88.6108
180	CNT-NH2-low_DMEP	-0.960288	1.25222	20.644	-646.53	110.875	110.815	125.05	22	8	164.987
181	CNT-NH2-low_NC4	-0.469949	1.25222	20.644	-646.53	110.875	110.815	74.17	9	4	174.839
182	CNT-NH2-low_MAS	-2.6247	1.25222	20.644	-646.53	110.875	110.815	74.09	13	5	133.671
183	CNT-NH2-low_MAMM	0.215053	1.25222	20.644	-646.53	110.875	110.815	32.08	2	1	76.6069
184	CNT-NH2-low_GLUP	-2.64471	1.25222	20.644	-646.53	110.875	110.815	74.09	13	5	138.953
185	CNT-NH2-low_BGLC	-3.8487	1.25222	20.644	-646.53	110.875	110.815	180.18	57	24	306.814
186	CNT-NH2-high_HID	-0.461072	1.63817	22.034	-747.235	111.35	111.31	82.12	15	7	121.675
187	CNT-NH2-high_HIE	-0.760065	1.63817	22.034	-747.235	111.35	111.31	82.12	15	7	121.675
188	CNT-NH2-high_THR	0.160901	1.63817	22.034	-747.235	111.35	111.31	46.08	5	2	110.364
189	CNT-NH2-high_VAL	0.589091	1.63817	22.034	-747.235	111.35	111.31	44.11	5	2	114.354
190	CNT-NH2-high_HIP	-0.836544	1.63817	22.034	-747.235	111.35	111.31	83.13	15	7	121.675
191	CNT-NH2-high_CYM	0.265886	1.63817	22.034	-747.235	111.35	111.31	47.11	2	1	88.6108
192	CNT-NH2-high_DMEP	-1.10484	1.63817	22.034	-747.235	111.35	111.31	125.05	22	8	164.987
193	CNT-NH2-high_NC4	-0.694436	1.63817	22.034	-747.235	111.35	111.31	74.17	9	4	174.839
194	CNT-NH2-high_MAS	-0.387212	1.63817	22.034	-747.235	111.35	111.31	74.09	13	5	133.671
195	CNT-NH2-high_MAMM	-1.26298	1.63817	22.034	-747.235	111.35	111.31	32.08	2	1	76.6069
196	CNT-NH2-high_GLUP	-0.978146	1.63817	22.034	-747.235	111.35	111.31	74.09	13	5	138.953
197	CNT-NH2-high_BGLC	-3.74176	1.63817	22.034	-747.235	111.35	111.31	180.18	57	24	306.814
198	CNT-OH-high_HID	-0.921658	1.75	32.6149	-582.197	111.325	111.18	82.12	15	7	121.675
199	CNT-OH-high_HIE	-1.45145	1.75	32.6149	-582.197	111.325	111.18	82.12	15	7	121.675
200	CNT-OH-high_THR	-0.0150545	1.75	32.6149	-582.197	111.325	111.18	46.08	5	2	110.364
201	CNT-OH-high_VAL	0.268246	1.75	32.6149	-582.197	111.325	111.18	44.11	5	2	114.354
202	CNT-OH-high_HIP	-2.27013	1.75	32.6149	-582.197	111.325	111.18	83.13	15	7	121.675
203	CNT-OH-high_CYM	-1.11813	1.75	32.6149	-582.197	111.325	111.18	47.11	2	1	88.6108
204	CNT-OH-high_DMEP	-3.65759	1.75	32.6149	-582.197	111.325	111.18	125.05	22	8	164.987
205	CNT-OH-high_NC4	-2.28151	1.75	32.6149	-582.197	111.325	111.18	74.17	9	4	174.839
206	CNT-OH-high_MAS	-0.074518	1.75	32.6149	-582.197	111.325	111.18	74.09	13	5	133.671
207	CNT-OH-high_MAMM	-0.314736	1.75	32.6149	-582.197	111.325	111.18	32.08	2	1	76.6069
208	CNT-OH-high_GLUP	-0.654038	1.75	32.6149	-582.197	111.325	111.18	74.09	13	5	138.953
209	CNT-OH-high_BGLC	-2.83399	1.75	32.6149	-582.197	111.325	111.18	180.18	57	24	306.814
210	Graphene-oxide_HID	-1.5653	1.35	6.1864	-399.864	111.195	111.395	82.12	15	7	121.675
211	Graphene-oxide_HIE	-1.31678	1.35	6.1864	-399.864	111.195	111.395	82.12	15	7	121.675
212	Graphene-oxide_THR	-0.333267	1.35	6.1864	-399.864	111.195	111.395	46.08	5	2	110.364
213	Graphene-oxide_VAL	-0.075837	1.35	6.1864	-399.864	111.195	111.395	44.11	5	2	114.354
214	Graphene-oxide_HIP	-2.31313	1.35	6.1864	-399.864	111.195	111.395	83.13	15	7	121.675
215	Graphene-oxide_CYM	0.0875728	1.35	6.1864	-399.864	111.195	111.395	47.11	2	1	88.6108
216	Graphene-oxide_DMEP	-0.969427	1.35	6.1864	-399.864	111.195	111.395	125.05	22	8	164.987
217	Graphene-oxide_NC4	-1.96404	1.35	6.1864	-399.864	111.195	111.395	74.17	9	4	174.839
218	Graphene-oxide_MAS	-0.838213	1.35	6.1864	-399.864	111.195	111.395	74.09	13	5	133.671
219	Graphene-oxide_MAMM	-0.826942	1.35	6.1864	-399.864	111.195	111.395	32.08	2	1	76.6069
220	Graphene-oxide_GLUP	-1.29835	1.35	6.1864	-399.864	111.195	111.395	74.09	13	5	138.953
221	Graphene-oxide_BGLC	-3.71146	1.35	6.1864	-399.864	111.195	111.395	180.18	57	24	306.814
222	Reduced-graphene-oxide_HID	-5.7371	1.73849	2.471	-330.059	111.01	111.205	82.12	15	7	121.675
223	Reduced-graphene-oxide_HIE	-5.57639	1.73849	2.471	-330.059	111.01	111.205	82.12	15	7	121.675
224	Reduced-graphene-oxide_THR	-2.06909	1.73849	2.471	-330.059	111.01	111.205	46.08	5	2	110.364
225	Reduced-graphene-oxide_VAL	-3.06833	1.73849	2.471	-330.059	111.01	111.205	44.11	5	2	114.354
226	Reduced-graphene-oxide_HIP	-5.43884	1.73849	2.471	-330.059	111.01	111.205	83.13	15	7	121.675
227	Reduced-graphene-oxide_CYM	-0.336668	1.73849	2.471	-330.059	111.01	111.205	47.11	2	1	88.6108
228	Reduced-graphene-oxide_DMEP	-2.73808	1.73849	2.471	-330.059	111.01	111.205	125.05	22	8	164.987
229	Reduced-graphene-oxide_NC4	-0.643279	1.73849	2.471	-330.059	111.01	111.205	74.17	9	4	174.839
230	Reduced-graphene-oxide_MAS	-5.15251	1.73849	2.471	-330.059	111.01	111.205	74.09	13	5	133.671
231	Reduced-graphene-oxide_MAMM	0.0394441	1.73849	2.471	-330.059	111.01	111.205	32.08	2	1	76.6069
232	Reduced-graphene-oxide_GLUP	-4.28282	1.73849	2.471	-330.059	111.01	111.205	74.09	13	5	138.953
233	Reduced-graphene-oxide_BGLC	-6.64641	1.73849	2.471	-330.059	111.01	111.205	180.18	57	24	306.814
234	Graphene_HID	-5.17734	1.17	0.013	-481.646	112.05	112.71	82.12	15	7	121.675
235	Graphene_HIE	-5.30118	1.17	0.013	-481.646	112.05	112.71	82.12	15	7	121.675
236	Graphene_THR	-1.46134	1.17	0.013	-481.646	112.05	112.71	46.08	5	2	110.364
237	Graphene_VAL	-1.8939	1.17	0.013	-481.646	112.05	112.71	44.11	5	2	114.354
238	Graphene_HIP	-5.44152	1.17	0.013	-481.646	112.05	112.71	83.13	15	7	121.675
239	Graphene_CYM	-0.344337	1.17	0.013	-481.646	112.05	112.71	47.11	2	1	88.6108
240	Graphene_DMEP	-1.88277	1.17	0.013	-481.646	112.05	112.71	125.05	22	8	164.987
241	Graphene_NC4	-0.582334	1.17	0.013	-481.646	112.05	112.71	74.17	9	4	174.839
242	Graphene_MAS	-4.18932	1.17	0.013	-481.646	112.05	112.71	74.09	13	5	133.671
243	Graphene_MAMM	0.0692233	1.17	0.013	-481.646	112.05	112.71	32.08	2	1	76.6069
244	Graphene_GLUP	-4.10421	1.17	0.013	-481.646	112.05	112.71	74.09	13	5	138.953
245	Graphene_BGLC	-6.1421	1.17	0.013	-481.646	112.05	112.71	180.18	57	24	306.814
246	CNT-COOH-high_HID	-0.429898	2.5	33.699	-630.086	111.175	110.975	82.12	15	7	121.675
247	CNT-COOH-high_HIE	-1.16673	2.5	33.699	-630.086	111.175	110.975	82.12	15	7	121.675
248	CNT-COOH-high_THR	0.11462	2.5	33.699	-630.086	111.175	110.975	46.08	5	2	110.364
249	CNT-COOH-high_VAL	0.104806	2.5	33.699	-630.086	111.175	110.975	44.11	5	2	114.354
250	CNT-COOH-high_HIP	-0.493385	2.5	33.699	-630.086	111.175	110.975	83.13	15	7	121.675
251	CNT-COOH-high_CYM	-2.87855	2.5	33.699	-630.086	111.175	110.975	47.11	2	1	88.6108
252	CNT-COOH-high_DMEP	-5.68227	2.5	33.699	-630.086	111.175	110.975	125.05	22	8	164.987
253	CNT-COOH-high_NC4	-0.293484	2.5	33.699	-630.086	111.175	110.975	74.17	9	4	174.839
254	CNT-COOH-high_MAS	-0.20236	2.5	33.699	-630.086	111.175	110.975	74.09	13	5	133.671
255	CNT-COOH-high_MAMM	0.0918335	2.5	33.699	-630.086	111.175	110.975	32.08	2	1	76.6069
256	CNT-COOH-high_GLUP	-1.61453	2.5	33.699	-630.086	111.175	110.975	74.09	13	5	138.953
257	CNT-COOH-high_BGLC	-0.875278	2.5	33.699	-630.086	111.175	110.975	180.18	57	24	306.814
258	CNT-COOH-low_HID	-3.10071	1.25	10.999	-711.254	111.07	110.915	82.12	15	7	121.675
259	CNT-COOH-low_HIE	-3.20198	1.25	10.999	-711.254	111.07	110.915	82.12	15	7	121.675
260	CNT-COOH-low_THR	-0.728578	1.25	10.999	-711.254	111.07	110.915	46.08	5	2	110.364
261	CNT-COOH-low_VAL	-0.554421	1.25	10.999	-711.254	111.07	110.915	44.11	5	2	114.354
262	CNT-COOH-low_HIP	-2.86743	1.25	10.999	-711.254	111.07	110.915	83.13	15	7	121.675
263	CNT-COOH-low_CYM	0.0627426	1.25	10.999	-711.254	111.07	110.915	47.11	2	1	88.6108
264	CNT-COOH-low_DMEP	-0.872832	1.25	10.999	-711.254	111.07	110.915	125.05	22	8	164.987
265	CNT-COOH-low_NC4	-0.214299	1.25	10.999	-711.254	111.07	110.915	74.17	9	4	174.839
266	CNT-COOH-low_MAS	-2.83048	1.25	10.999	-711.254	111.07	110.915	74.09	13	5	133.671
267	CNT-COOH-low_MAMM	0.243315	1.25	10.999	-711.254	111.07	110.915	32.08	2	1	76.6069
268	CNT-COOH-low_GLUP	-2.02051	1.25	10.999	-711.254	111.07	110.915	74.09	13	5	138.953
269	CNT-COOH-low_BGLC	-3.48563	1.25	10.999	-711.254	111.07	110.915	180.18	57	24	306.814
270	CNT-NH3(+)-low_HID	-2.24909	1.34368	34.803	-739.64	111.345	111.21	82.12	15	7	121.675
271	CNT-NH3(+)-low_HIE	-3.04994	1.34368	34.803	-739.64	111.345	111.21	82.12	15	7	121.675
272	CNT-NH3(+)-low_THR	-0.301571	1.34368	34.803	-739.64	111.345	111.21	46.08	5	2	110.364
273	CNT-NH3(+)-low_VAL	-0.545446	1.34368	34.803	-739.64	111.345	111.21	44.11	5	2	114.354
274	CNT-NH3(+)-low_HIP	-1.86003	1.34368	34.803	-739.64	111.345	111.21	83.13	15	7	121.675
275	CNT-NH3(+)-low_NC4	0.293112	1.34368	34.803	-739.64	111.345	111.21	74.17	9	4	174.839
276	CNT-NH3(+)-low_MAS	-2.91305	1.34368	34.803	-739.64	111.345	111.21	74.09	13	5	133.671
277	CNT-NH3(+)-low_MAMM	0.432025	1.34368	34.803	-739.64	111.345	111.21	32.08	2	1	76.6069
278	CNT-NH3(+)-low_GLUP	-2.31403	1.34368	34.803	-739.64	111.345	111.21	74.09	13	5	138.953
279	CNT-NH3(+)-low_BGLC	-4.21176	1.34368	34.803	-739.64	111.345	111.21	180.18	57	24	306.814
280	CNT-NH3(+)-high_HID	-2.77043	1.52911	44.075	-371.26	111.305	111.605	82.12	15	7	121.675
281	CNT-NH3(+)-high_HIE	-2.2717	1.52911	44.075	-371.26	111.305	111.605	82.12	15	7	121.675
282	CNT-NH3(+)-high_THR	-0.317084	1.52911	44.075	-371.26	111.305	111.605	46.08	5	2	110.364
283	CNT-NH3(+)-high_VAL	-0.0603749	1.52911	44.075	-371.26	111.305	111.605	44.11	5	2	114.354
284	CNT-NH3(+)-high_HIP	-1.05539	1.52911	44.075	-371.26	111.305	111.605	83.13	15	7	121.675
285	CNT-NH3(+)-high_NC4	0.662723	1.52911	44.075	-371.26	111.305	111.605	74.17	9	4	174.839
286	CNT-NH3(+)-high_MAS	-1.76165	1.52911	44.075	-371.26	111.305	111.605	74.09	13	5	133.671
287	CNT-NH3(+)-high_MAMM	0.657165	1.52911	44.075	-371.26	111.305	111.605	32.08	2	1	76.6069
288	CNT-NH3(+)-high_GLUP	-1.8654	1.52911	44.075	-371.26	111.305	111.605	74.09	13	5	138.953
289	CNT-NH3(+)-high_BGLC	-2.78376	1.52911	44.075	-371.26	111.305	111.605	180.18	57	24	306.814
290	Anatase-OH-100_HID	0.290627	1.544	57.8982	-523.966	110.735	111.51	82.12	15	7	121.675
291	Anatase-OH-100_HIE	0.274438	1.544	57.8982	-523.966	110.735	111.51	82.12	15	7	121.675
292	Anatase-OH-100_THR	0.402931	1.544	57.8982	-523.966	110.735	111.51	46.08	5	2	110.364
293	Anatase-OH-100_VAL	0.525939	1.544	57.8982	-523.966	110.735	111.51	44.11	5	2	114.354
294	Anatase-OH-100_HIP	-0.164952	1.544	57.8982	-523.966	110.735	111.51	83.13	15	7	121.675
295	Anatase-OH-100_CYM	-3.5384	1.544	57.8982	-523.966	110.735	111.51	47.11	2	1	88.6108
296	Anatase-OH-100_DMEP	-0.155166	1.544	57.8982	-523.966	110.735	111.51	125.05	22	8	164.987
297	Anatase-OH-100_NC4	0.185499	1.544	57.8982	-523.966	110.735	111.51	74.17	9	4	174.839
298	Anatase-OH-100_MAS	0.442235	1.544	57.8982	-523.966	110.735	111.51	74.09	13	5	133.671
299	Anatase-OH-100_MAMM	-0.184529	1.544	57.8982	-523.966	110.735	111.51	32.08	2	1	76.6069
300	Anatase-OH-100_GLUP	0.315927	1.544	57.8982	-523.966	110.735	111.51	74.09	13	5	138.953
301	Anatase-OH-100_BGLC	-0.404941	1.544	57.8982	-523.966	110.735	111.51	180.18	57	24	306.814
